# Supplementary material
Source: publisher figshare collection journal article supplement (https://gsapubs.figshare.com/ndownloader/files/22744298)
Supplement: Supplementary file 1 [file 22744298]

Cheney, E.S., and Hayman, N.W., 2009, The Chiwaukum Structural Low, eastern Cascade Range, Washington, *in* O'Connor, J.E., Dorsey, R.J., and Madin, I.P., eds., *Volcanoes to Vineyards: Geologic Field Trips through the Dynamic Landscape of the Pacific Northwest: Geological Society of America Field Guide 15*, p. 19–52, doi: 10.1130/2009.fld015(02).

## INTRODUCTION

This Item provides documentation for the geology shown in Figures 4, 5, and 7 of Cheney and Hayman (2009). Specifically, this item includes copies of maps compiled from the field sheets of parts of nine 1:24,000 quadrangles.

### 1:24,000 GEOLOGIC MAPS

The only modifications to the original compilations are the printed labels for formations and structures. Because these maps are essentially field sheets, their style and quality obviously are less than that of published geologic maps.

Figure R1 shows the location of the quadrangles and is the explanation for all of the 1:24,000 quadrangles. However, several units that were too small to show in Figures 4 and 5 of Cheney and Hayman (2009) occur on some of the 1:24,000 maps. These are:

- (1) Qlb: landslide material of Columbia River Basalt in the Blewett Pass quadrangle;
- (2) Qls: landslides in the Leavenworth quadrangle;
- (3) Qga: Quaternary glacial and alluvial sediments are more extensive than shown in Cheney and Hayman (2009);
- (4) Tnl: residual boulders let down by erosion of unit Tn in the Winton quadrangle;
- (5) Tsg: olive, volcanoclastic siltstone in the Swauk Formation in the Blewett Pass quadrangle; and
- (6) Metamorphic rocks in the western parts of the Blewett, Leavenworth, and Winton quadrangles. The ages of these rocks relative to one another are unknown except that Ptu cuts all of the other metamorphic rocks. The metamorphic rocks are:

- PTa: amphibolite
- PTb: biotitic schist
- PTf: felsic metavolcanic rocks
- PTg: greenstone
- PTr: argillite
- PTu: serpentinite (and peridotite)

The geology shown on the 1:24,000 maps of the Blewett Pass, Van Creek, and Sugarloaf Peak 1:24,000 quadrangles is modestly more extensive and slightly different than shown in Figures 4, 5, and 7 of Cheney and Hayman (2009). This is because after the field guide was accepted in June 2009, mapping continued to November 2009.

### Caption to Figure R1

Figure R1, Index to 1:24,000 geologic maps and most of the lithologic units in and adjacent to the Chiwaukum Structural Low. Additional units are listed in the text of this Item. The 1:24,000 quadrangles are: (1) Blewett Pass (formerly Swauk Pass), (2) Liberty, (3) Tip Top, (4) Blewett, (5) Leavenworth, (6) Van Creek, (7) Winton, (8) Sugarloaf Peak, and (9) Plain.

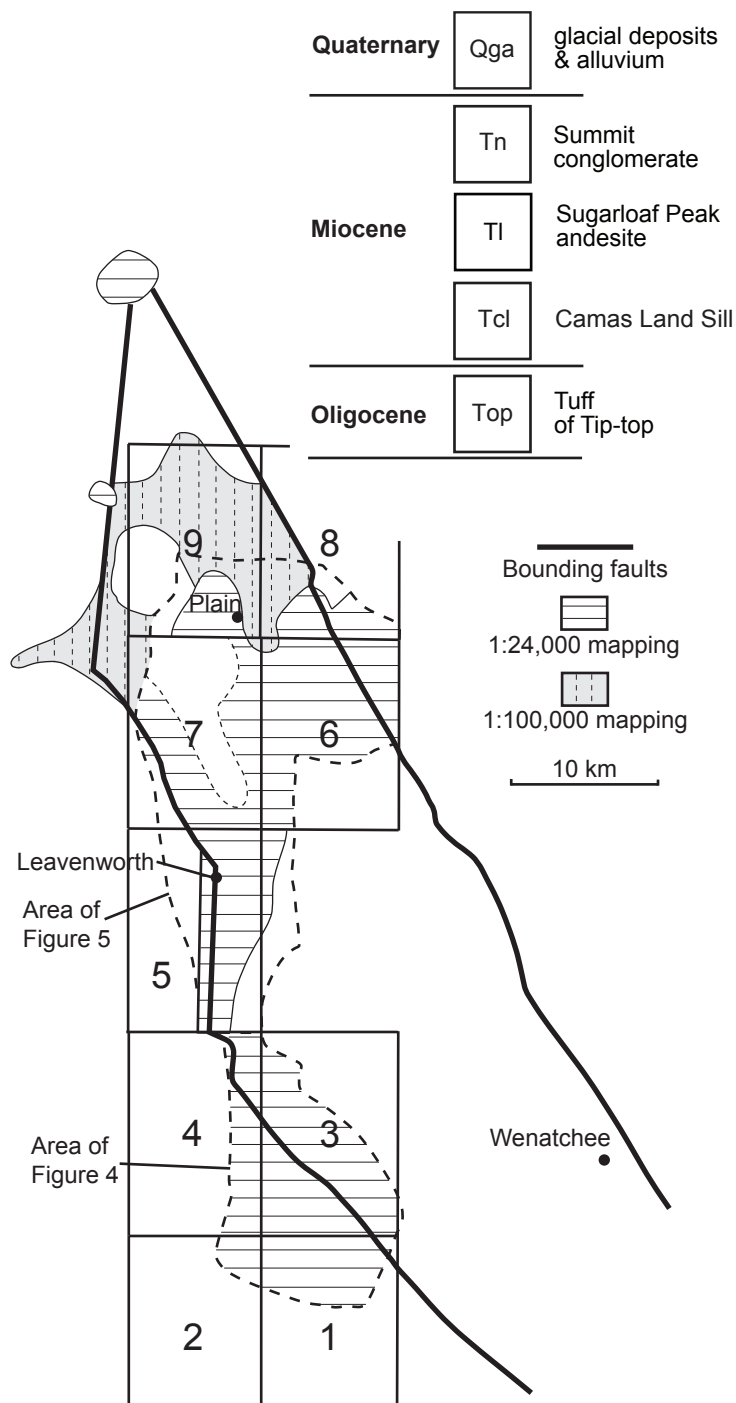

## Eocene

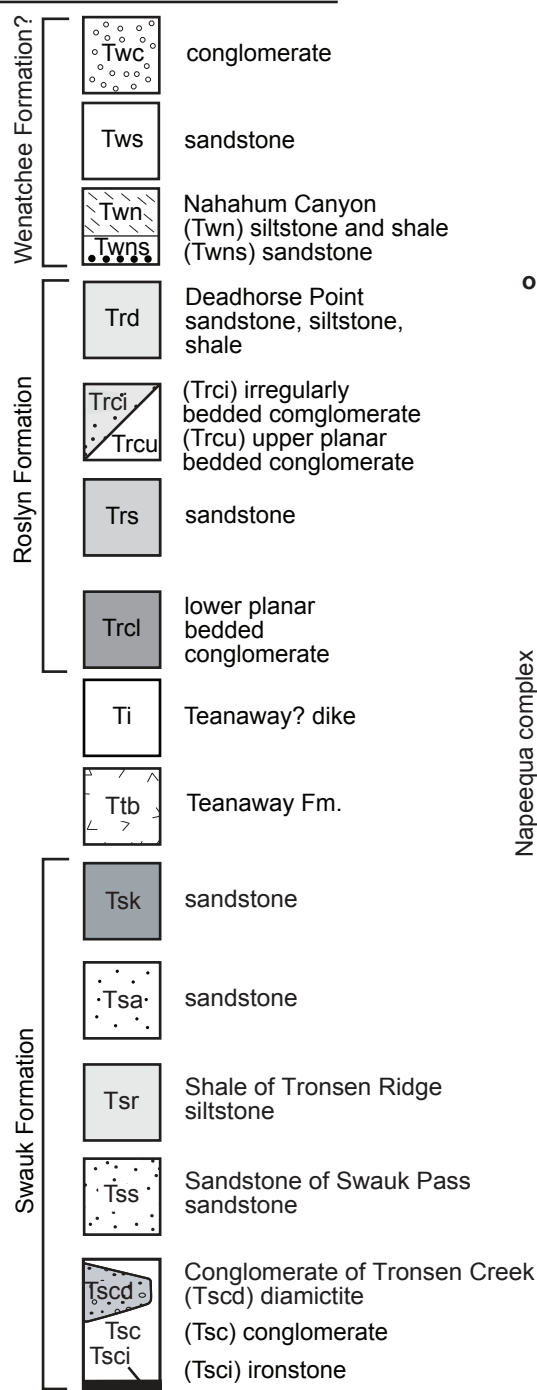

## Pre-Tertiary on west side

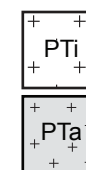

## Pre-Tertiary on northeast side

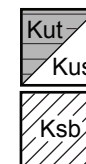

Napeequa complex

relative ages uncertain

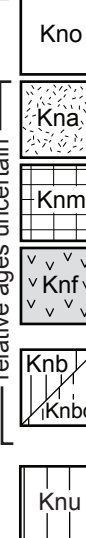

2-12

Field Trip Stop

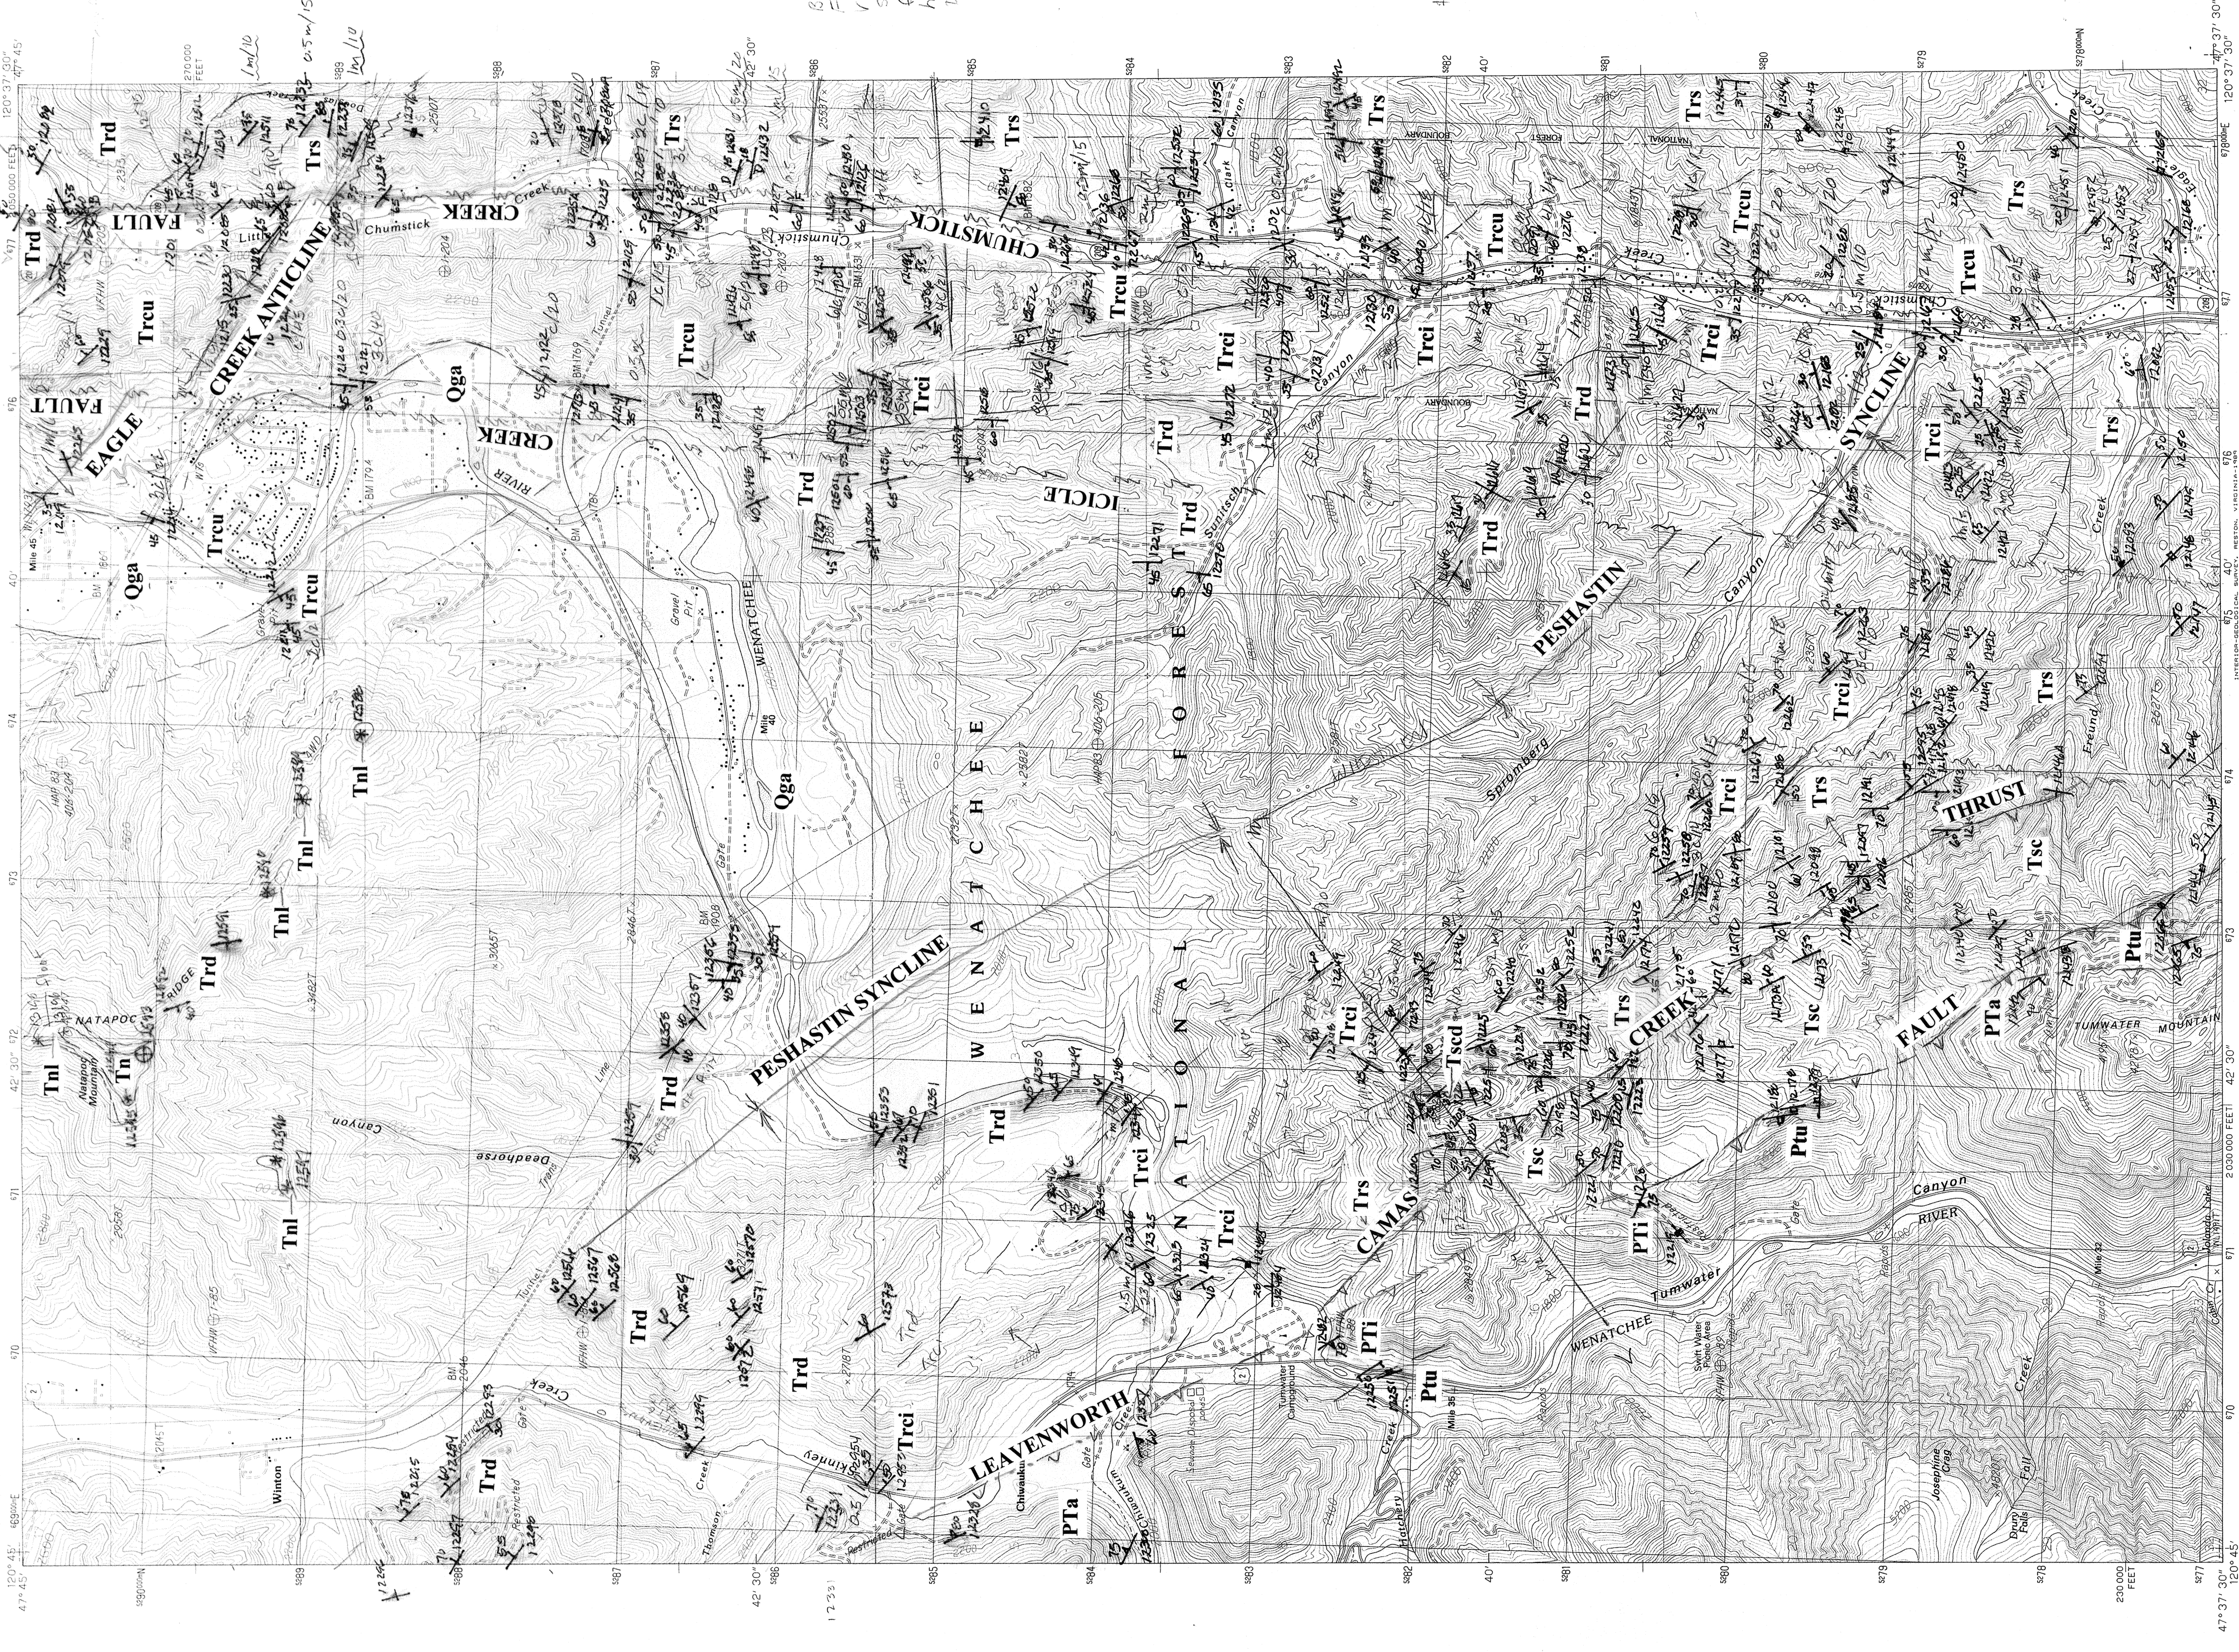

PRODUCED BY THE UNITED STATES GEOLOGICAL SURVEY  
CONTROL BY .....  
COMPILED FROM AERIAL PHOTOGRAPHS TAKEN .....  
LIMITED REVISION FROM AERIAL PHOTOGRAPHS TAKEN .....  
FIELD CHECKED .....  
GRIP 100-METER UNIVERSAL TRANSVERSE MERCATOR .....  
1000-FOOT STATE GRID TICKS .....  
VERTICAL DATUM .....  
To place on the predicted North American Datum of 1983,  
C2) meters and 89 meters.

PROVISIONAL MAP  
Produced from original  
manuscript drawings. Infor-  
mation shown as of date of  
field check.

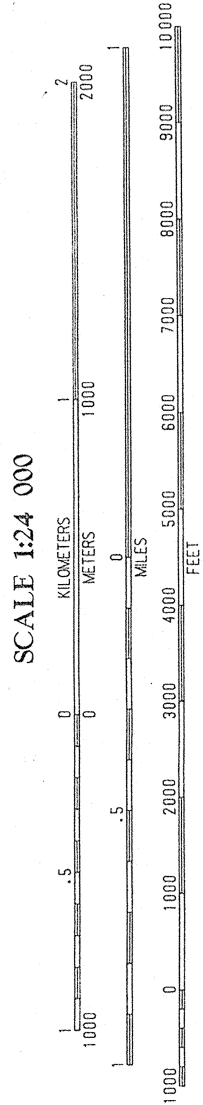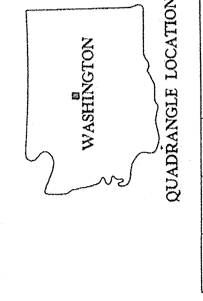

ROAD LEGEND  
Improved Road .....  
Unimproved Road .....  
Trail .....  
Interstate Route .....  
State Route .....

| 1 | 2 | 3 |
|---|---|---|
| 1 | 2 | 3 |
| 4 | 5 | 6 |
| 7 | 8 | 9 |

THIS MAP COMPLIES WITH NATIONAL MAP ACCURACY STANDARDS  
FOR SALE BY U.S. GEOLOGICAL SURVEY, DENVER COLORADO 80225  
OR RESTON, VIRGINIA 22092

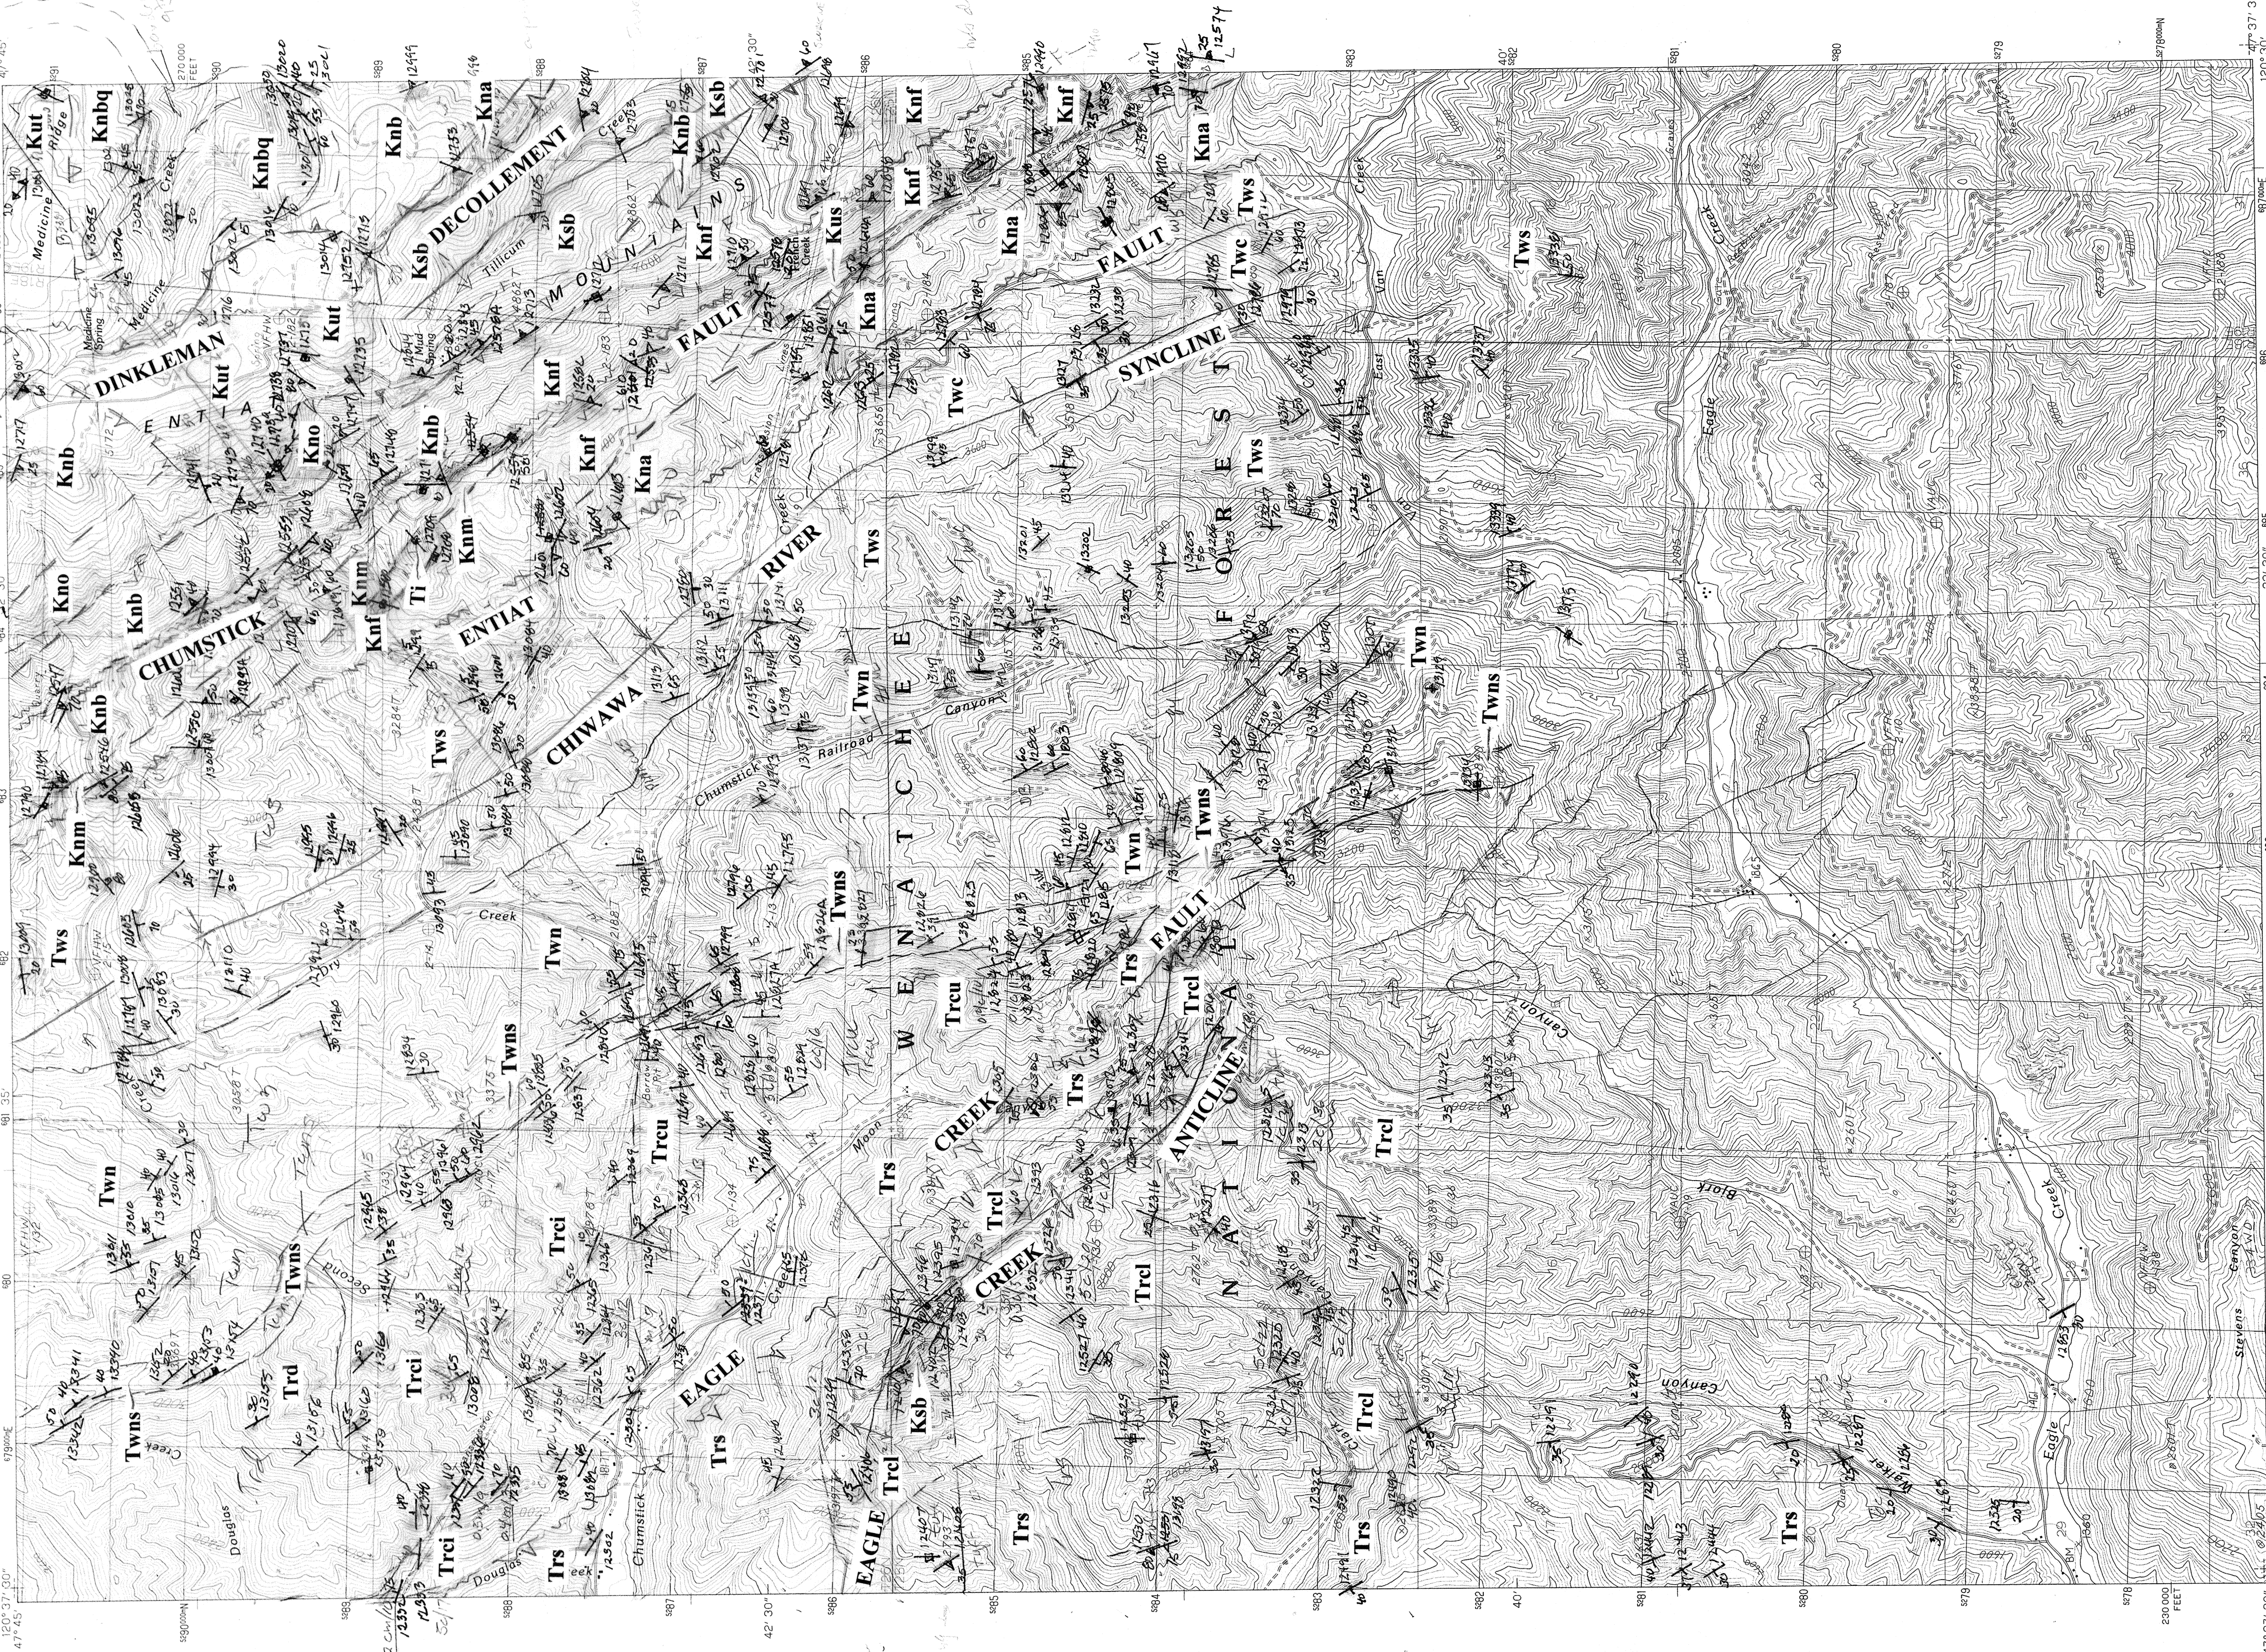

PRODUCED BY THE UNITED STATES GEOLOGICAL SURVEY  
COMPILED FROM AERIAL PHOTOGRAPHS TAKEN IN 1963  
FIELD CHECKED FROM AERIAL PHOTOGRAPHS TAKEN IN 1963  
FIELD CHECKED FROM AERIAL PHOTOGRAPHS TAKEN IN 1963  
PROJECTION: UTM  
GRID: 100-METER STATE GRID TICS  
UTM GRID DECLINATION: 11.4 MINUTES  
VERTICAL DATUM: 1929 NORTH AMERICAN DATUM  
To place on the predicted North American Datum of 1983,  
elevation values shown by dashed corner ticks  
must be reduced by 0.15 meter (6 inches).  
There may be private inholdings within the boundaries of any  
Federal and State Reservations shown on this map.  
No distinction made between houses, barns, and other buildings  
Public Land Survey System is shown as published in 1964 and verified  
or supplemented in 1967.

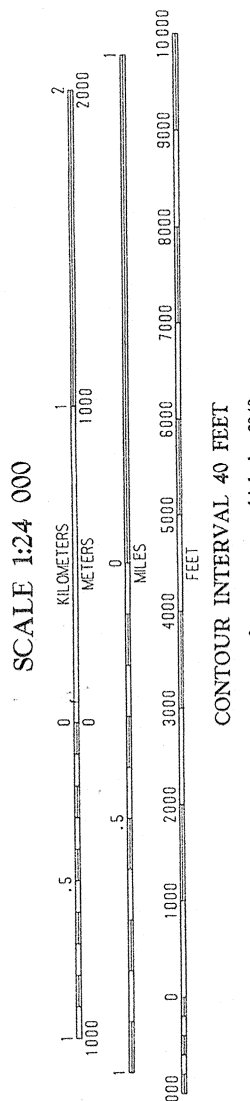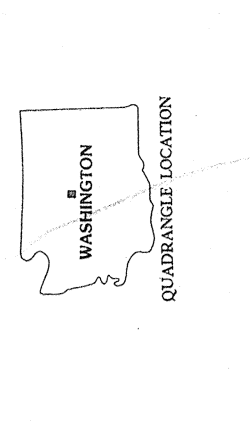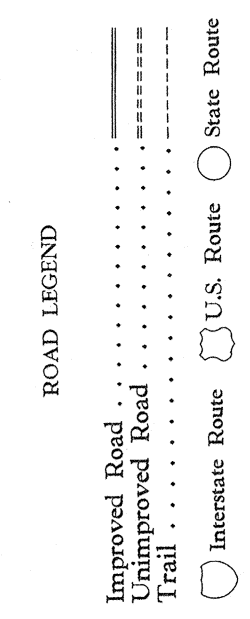

PROVISIONAL MAP  
Produced from original  
manuscript drawings. Infor-  
mation shown as of date of  
field check.

|        |        |        |        |        |        |        |        |
|--------|--------|--------|--------|--------|--------|--------|--------|
| 1      | 2      | 3      | 4      | 5      | 6      | 7      | 8      |
| Peak   | Spot   | Peak   | Spot   | Peak   | Spot   | Peak   | Spot   |
| Water  |
| Marsh  |
| Swamp  |
| Barren |
| Barren |
| Barren |
| Barren |

THIS MAP COMPLIES WITH NATIONAL MAP ACCURACY STANDARDS  
FOR SALE BY U.S. GEOLOGICAL SURVEY, DENVER, COLORADO 80225  
OR RESTON, VIRGINIA 22092



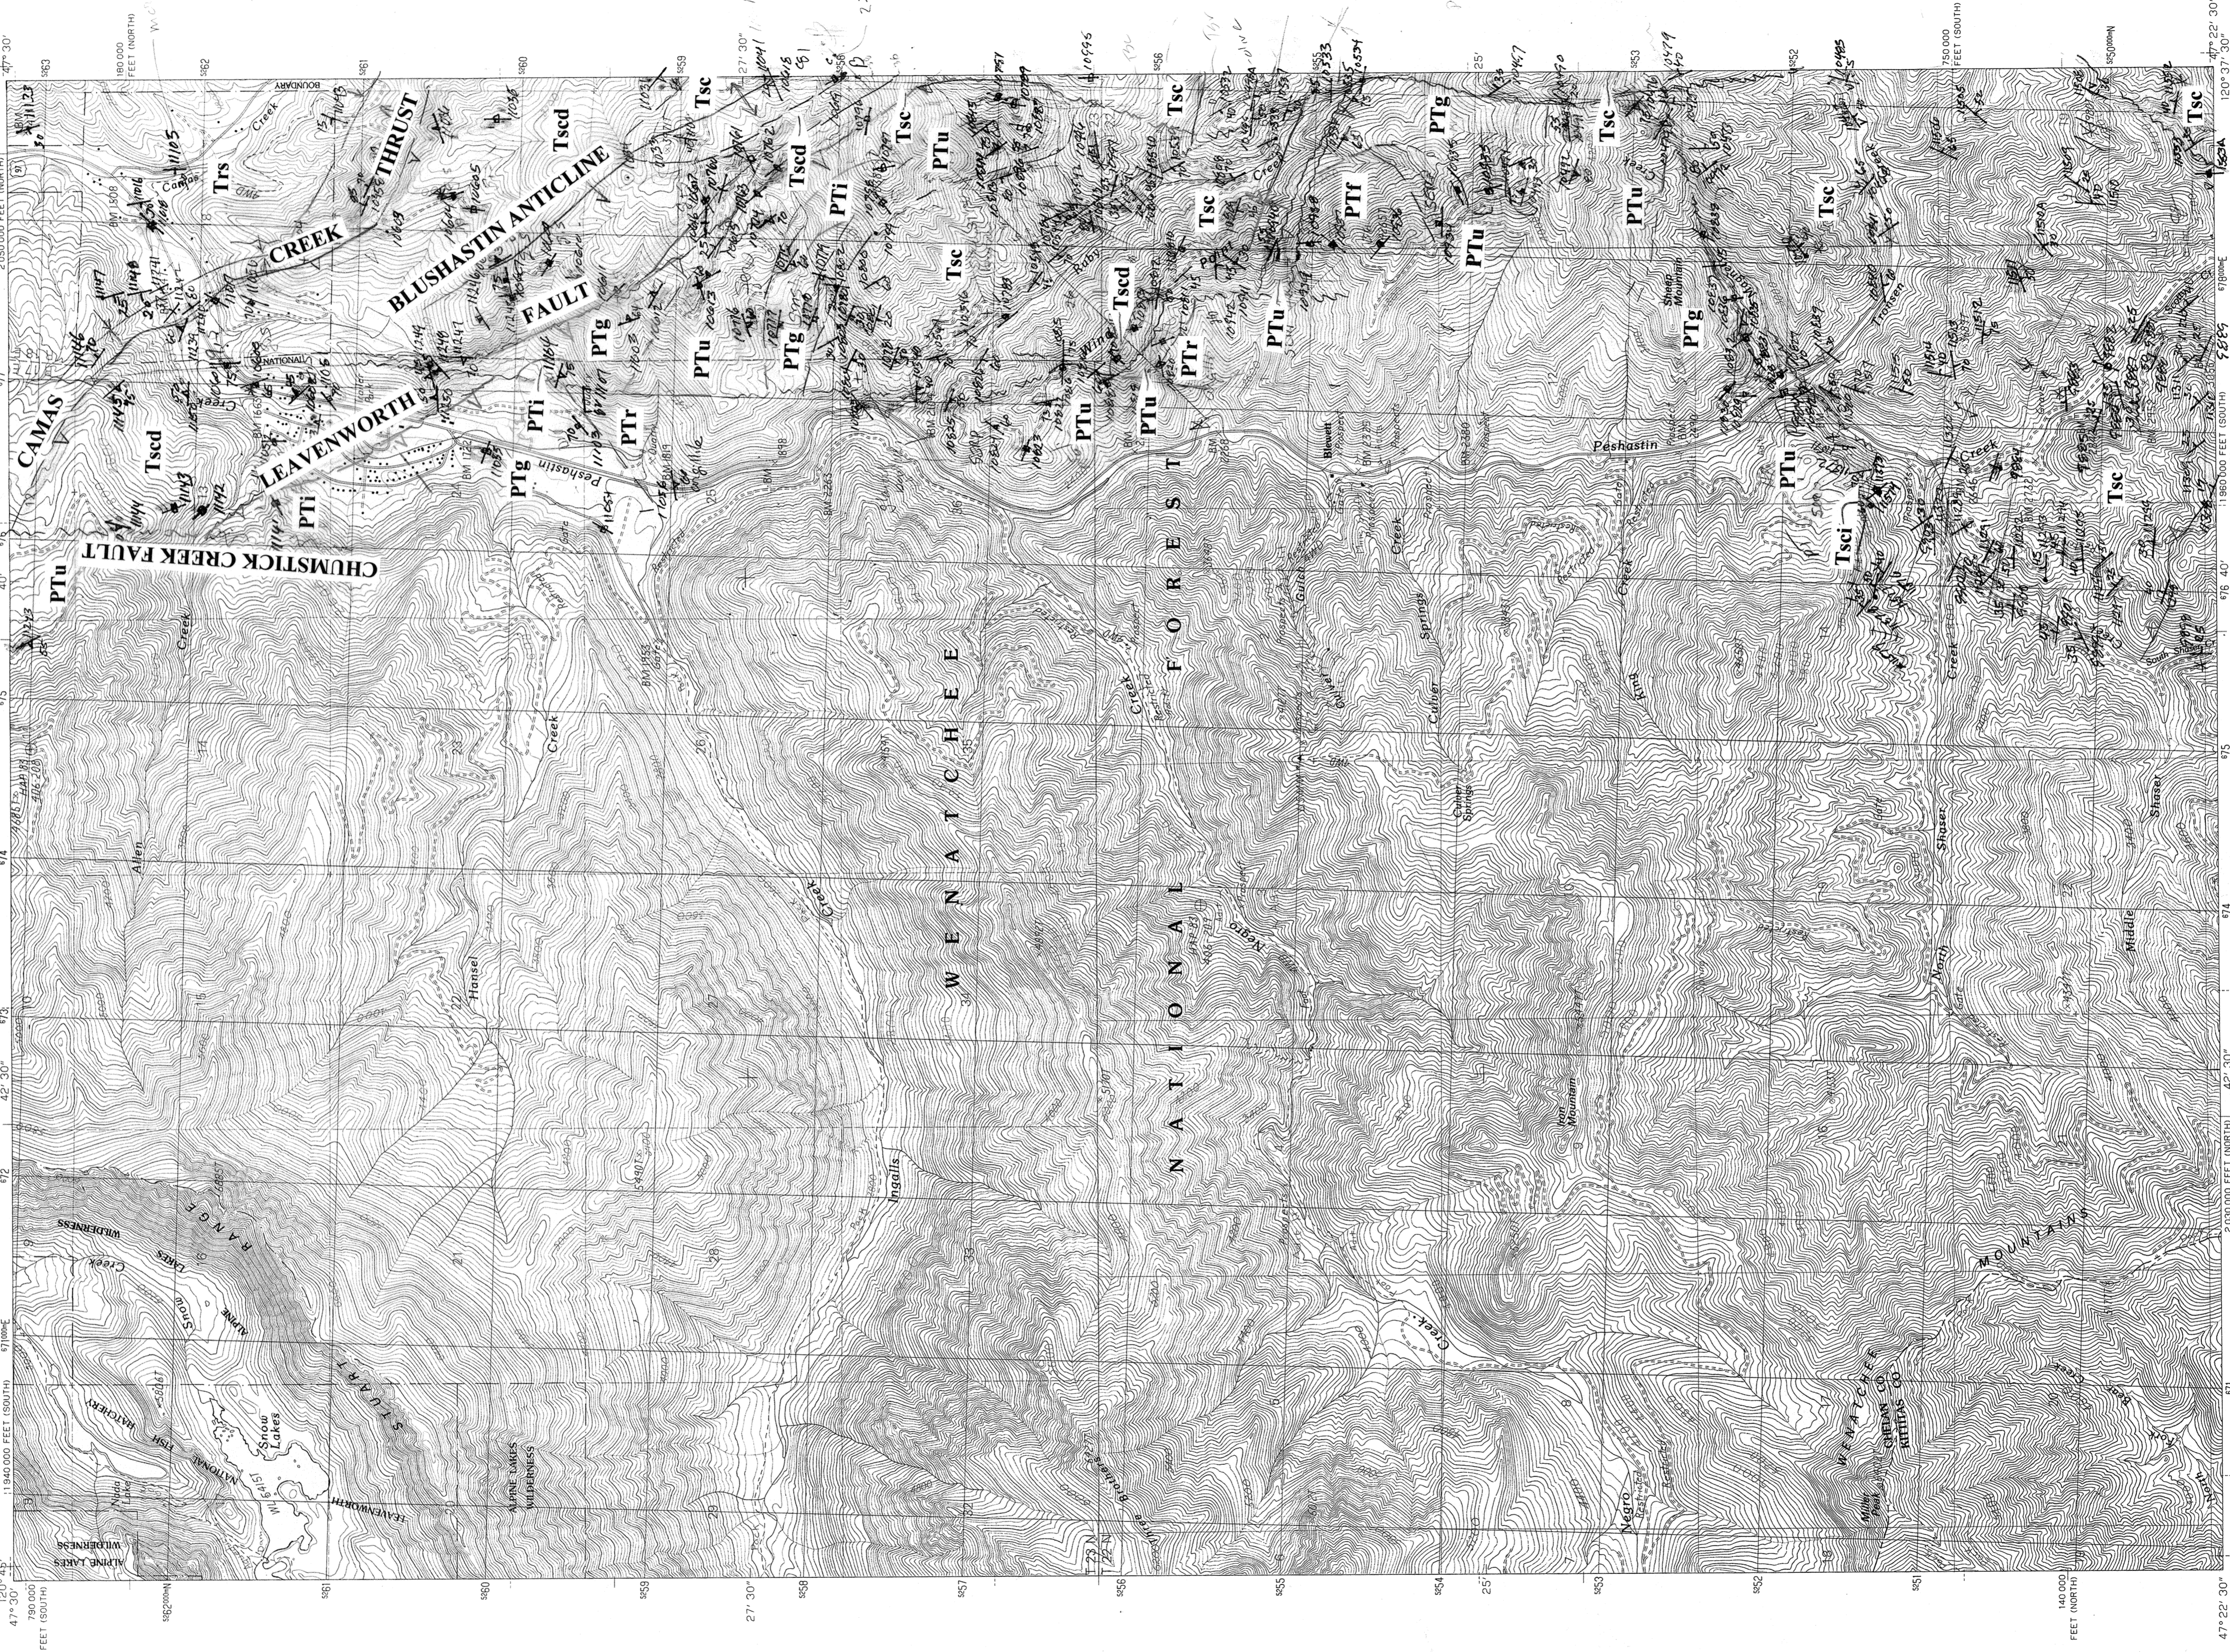

PRODUCED BY THE UNITED STATES GEOLOGICAL SURVEY  
CONTROL BY THE NATIONAL GEODETIC SURVEY  
COMPILED FROM AERIAL PHOTOGRAPHS TAKEN IN 1961  
FIELD CHECKED BY THE GEOLOGICAL SURVEY IN 1961  
FIELD CHECKED BY THE GEOLOGICAL SURVEY IN 1961  
PROJECTION: LAMBERT CONFORMAL CONIC  
GRID: 1983 NAD 83 STATE GRID TICS  
WASHINGTON, SOUTH ZONE  
UTM GRID DECLINATION: 12° 00' 00" EAST  
VERTICAL DATUM: 1927 NORTH AMERICAN DATUM  
HORIZONTAL DATUM: 1927 NORTH AMERICAN DATUM  
To place on the predicted North American Datum of 1983,  
move the projection lines as shown by dashed corner ticks  
121 meters north and 69 meters east  
Federal and State Reservations shown on this map  
No distinction made between houses, barns, and other buildings  
Public Land Survey System is shown as published in 1961 and  
verified or supplemented in 1987

PROVISIONAL MAP  
Produced from original  
manuscript drawings. Infor-  
mation shown as of date of  
field check.

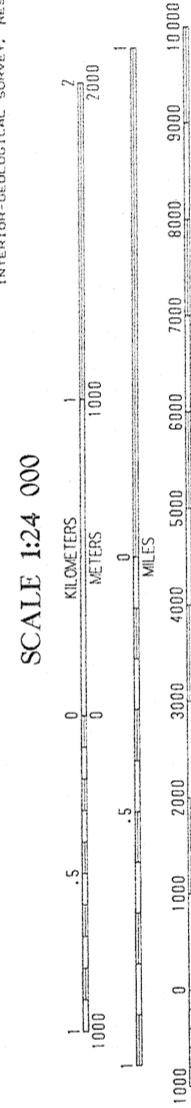

CONTOUR INTERVAL 40 FEET  
To convert feet to meters multiply by .3048  
To convert meters to feet multiply by 3.2808

FOR SALE BY U.S. GEOLOGICAL SURVEY, DANFORTH COLORADO 80225  
OR RISTON, VIRGINIA 22092

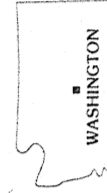

| QUADRANGLE LOCATION |   |   |   |   |   |   |   |
|---------------------|---|---|---|---|---|---|---|
| 1                   | 2 | 3 | 4 | 5 | 6 | 7 | 8 |
|                     |   |   |   |   |   |   |   |

ADJOINING 7.5 QUADRANGLE NAMES

ROAD LEGEND

Improved Road  
Unimproved Road  
Trail  
Interstate Route  
U.S. Route  
State Route

BLEWETT, WASHINGTON  
PROVISIONAL EDITION 1989

4712N-D6-TT-024

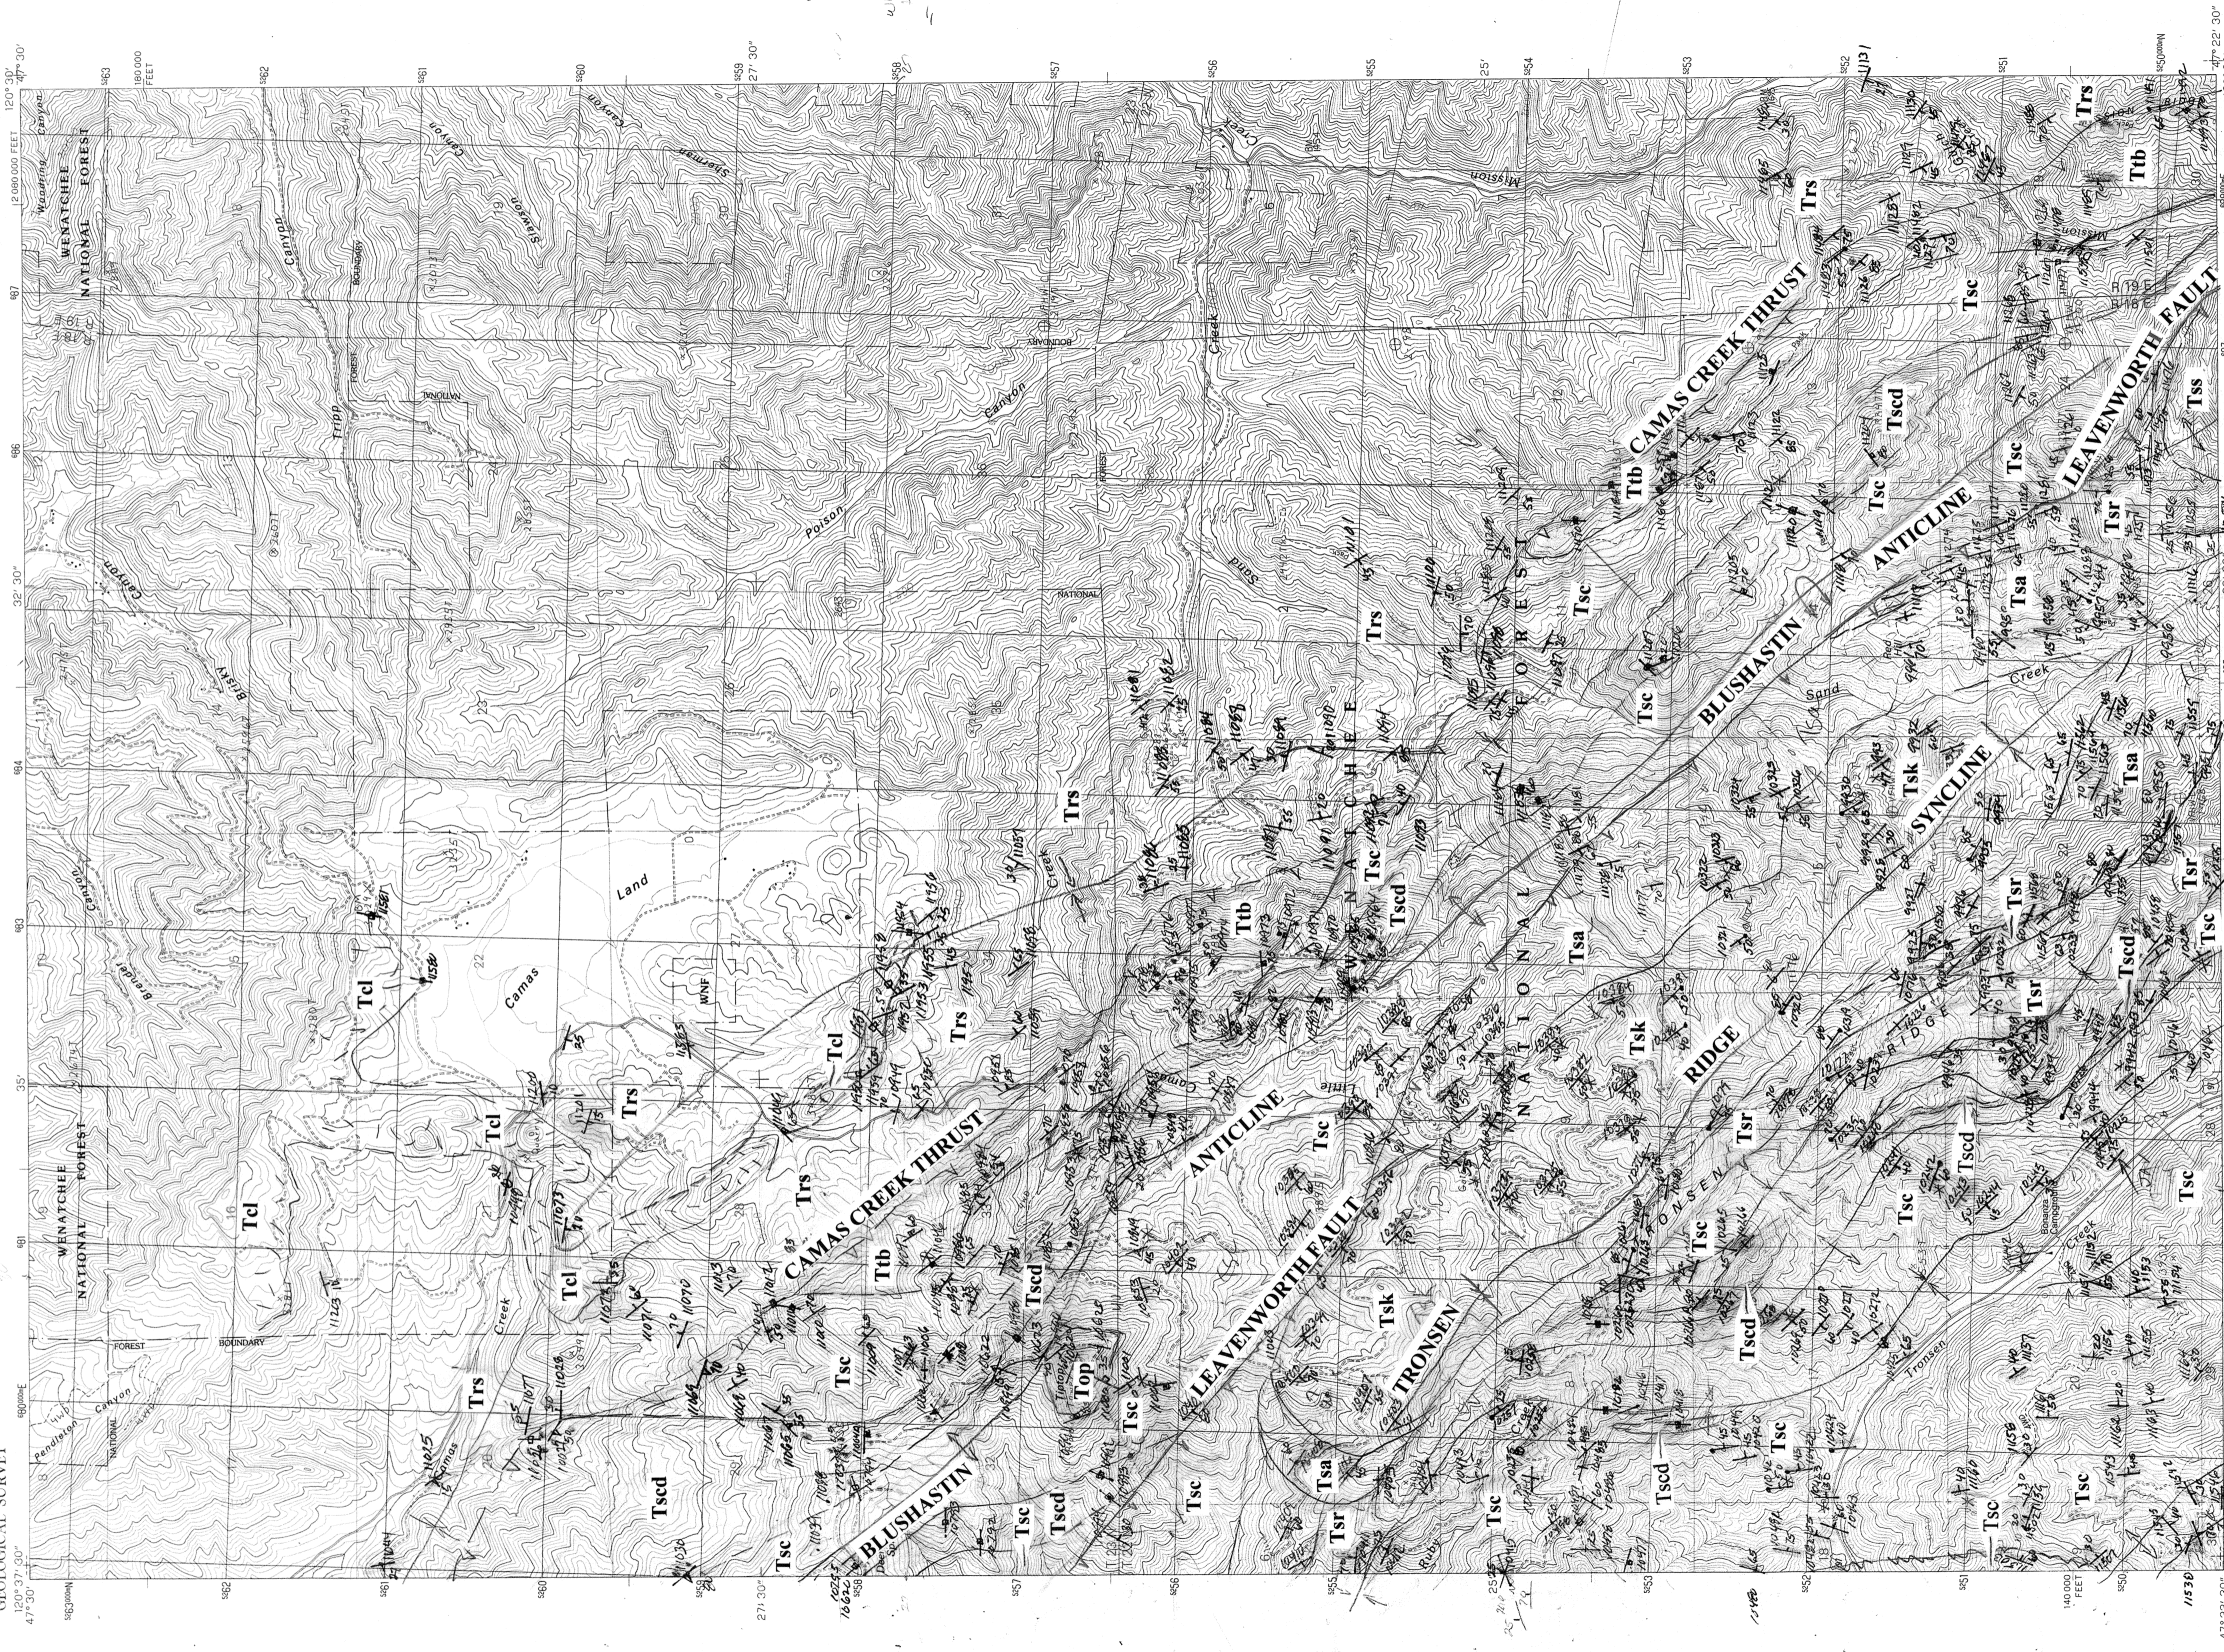

PRODUCED BY THE UNITED STATES GEOLOGICAL SURVEY  
CONTROL BY AERIAL PHOTOGRAPHY TAKEN ..... 1961  
FIELD CHECKED ..... 1961  
LIMITED REVISION ..... 1961  
FROM AERIAL PHOTOGRAPHS TAKEN ..... 1961  
MAINTAINED ..... 1961  
PROJECTION ..... LAMBERT CONFORMAL CONIC  
GRID 100-METER UNIVERSAL TRANSVERSE MERCATOR ..... WASHINGTON, NORTH 48° EAST  
1983 MAGNETIC NORTH DECLINATION ..... 19° 30' EAST  
VERTICAL DATUM ..... 1983  
HORIZONTAL DATUM ..... 1983  
The predicted North American Datum of 1983,  
move the projection lines as shown by dashed corner ticks  
(23 meters north and 89 meters east)  
There may be private inholdings within the boundaries of any  
Federal and State Reservations shown on this map  
No distinction made between houses, barns, and other buildings  
Public Land Survey System is shown as published in 1961 and

**PROVISIONAL MAP**  
Produced from original  
manuscript drawings. Infor-  
mation shown as of date of  
field check.

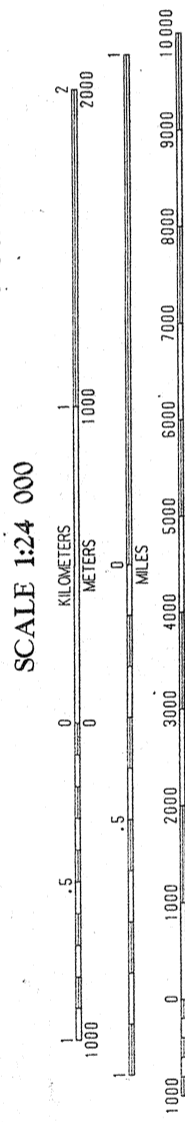

CONTOUR INTERVAL 40 FEET  
To convert feet to meters multiply by .3048  
To convert meters to feet multiply by 3.2808

FOR SALE BY U.S. GEOLOGICAL SURVEY, DENVER, COLORADO 80225  
OR RESTON, VIRGINIA 22092

| QUADRANGLE LOCATION |            |         |             |             |            |         |             |
|---------------------|------------|---------|-------------|-------------|------------|---------|-------------|
| 1                   | 2          | 3       | 4           | 5           | 6          | 7       | 8           |
| Leavenworth         | Blushastin | Tronsen | Camas Creek | Leavenworth | Blushastin | Tronsen | Camas Creek |
| 1                   | 2          | 3       | 4           | 5           | 6          | 7       | 8           |
| Leavenworth         | Blushastin | Tronsen | Camas Creek | Leavenworth | Blushastin | Tronsen | Camas Creek |
| 1                   | 2          | 3       | 4           | 5           | 6          | 7       | 8           |
| Leavenworth         | Blushastin | Tronsen | Camas Creek | Leavenworth | Blushastin | Tronsen | Camas Creek |

**ROAD LEGEND**  
Improved Road .....  
Unimproved Road .....  
Trail .....  
Instate Route .....  
U.S. Route .....  
State Route .....  
TIPTOP, WASHINGTON  
PROVISIONAL EDITION 1989  
4710-D5-IT-024

1-  
946  
basaltic cgl  
with calcare ss  
942  
white wacke  
thin bedded  
= chert streak

TIPTOP (map 3 of 9) of Geological Society of America Data Repository Item 2009211  
(submitted November 2009) to accompany Cheney, E. S., and Hayman, N.W., 2009,  
Geological Society America Guidebook 15, p. 19-52.

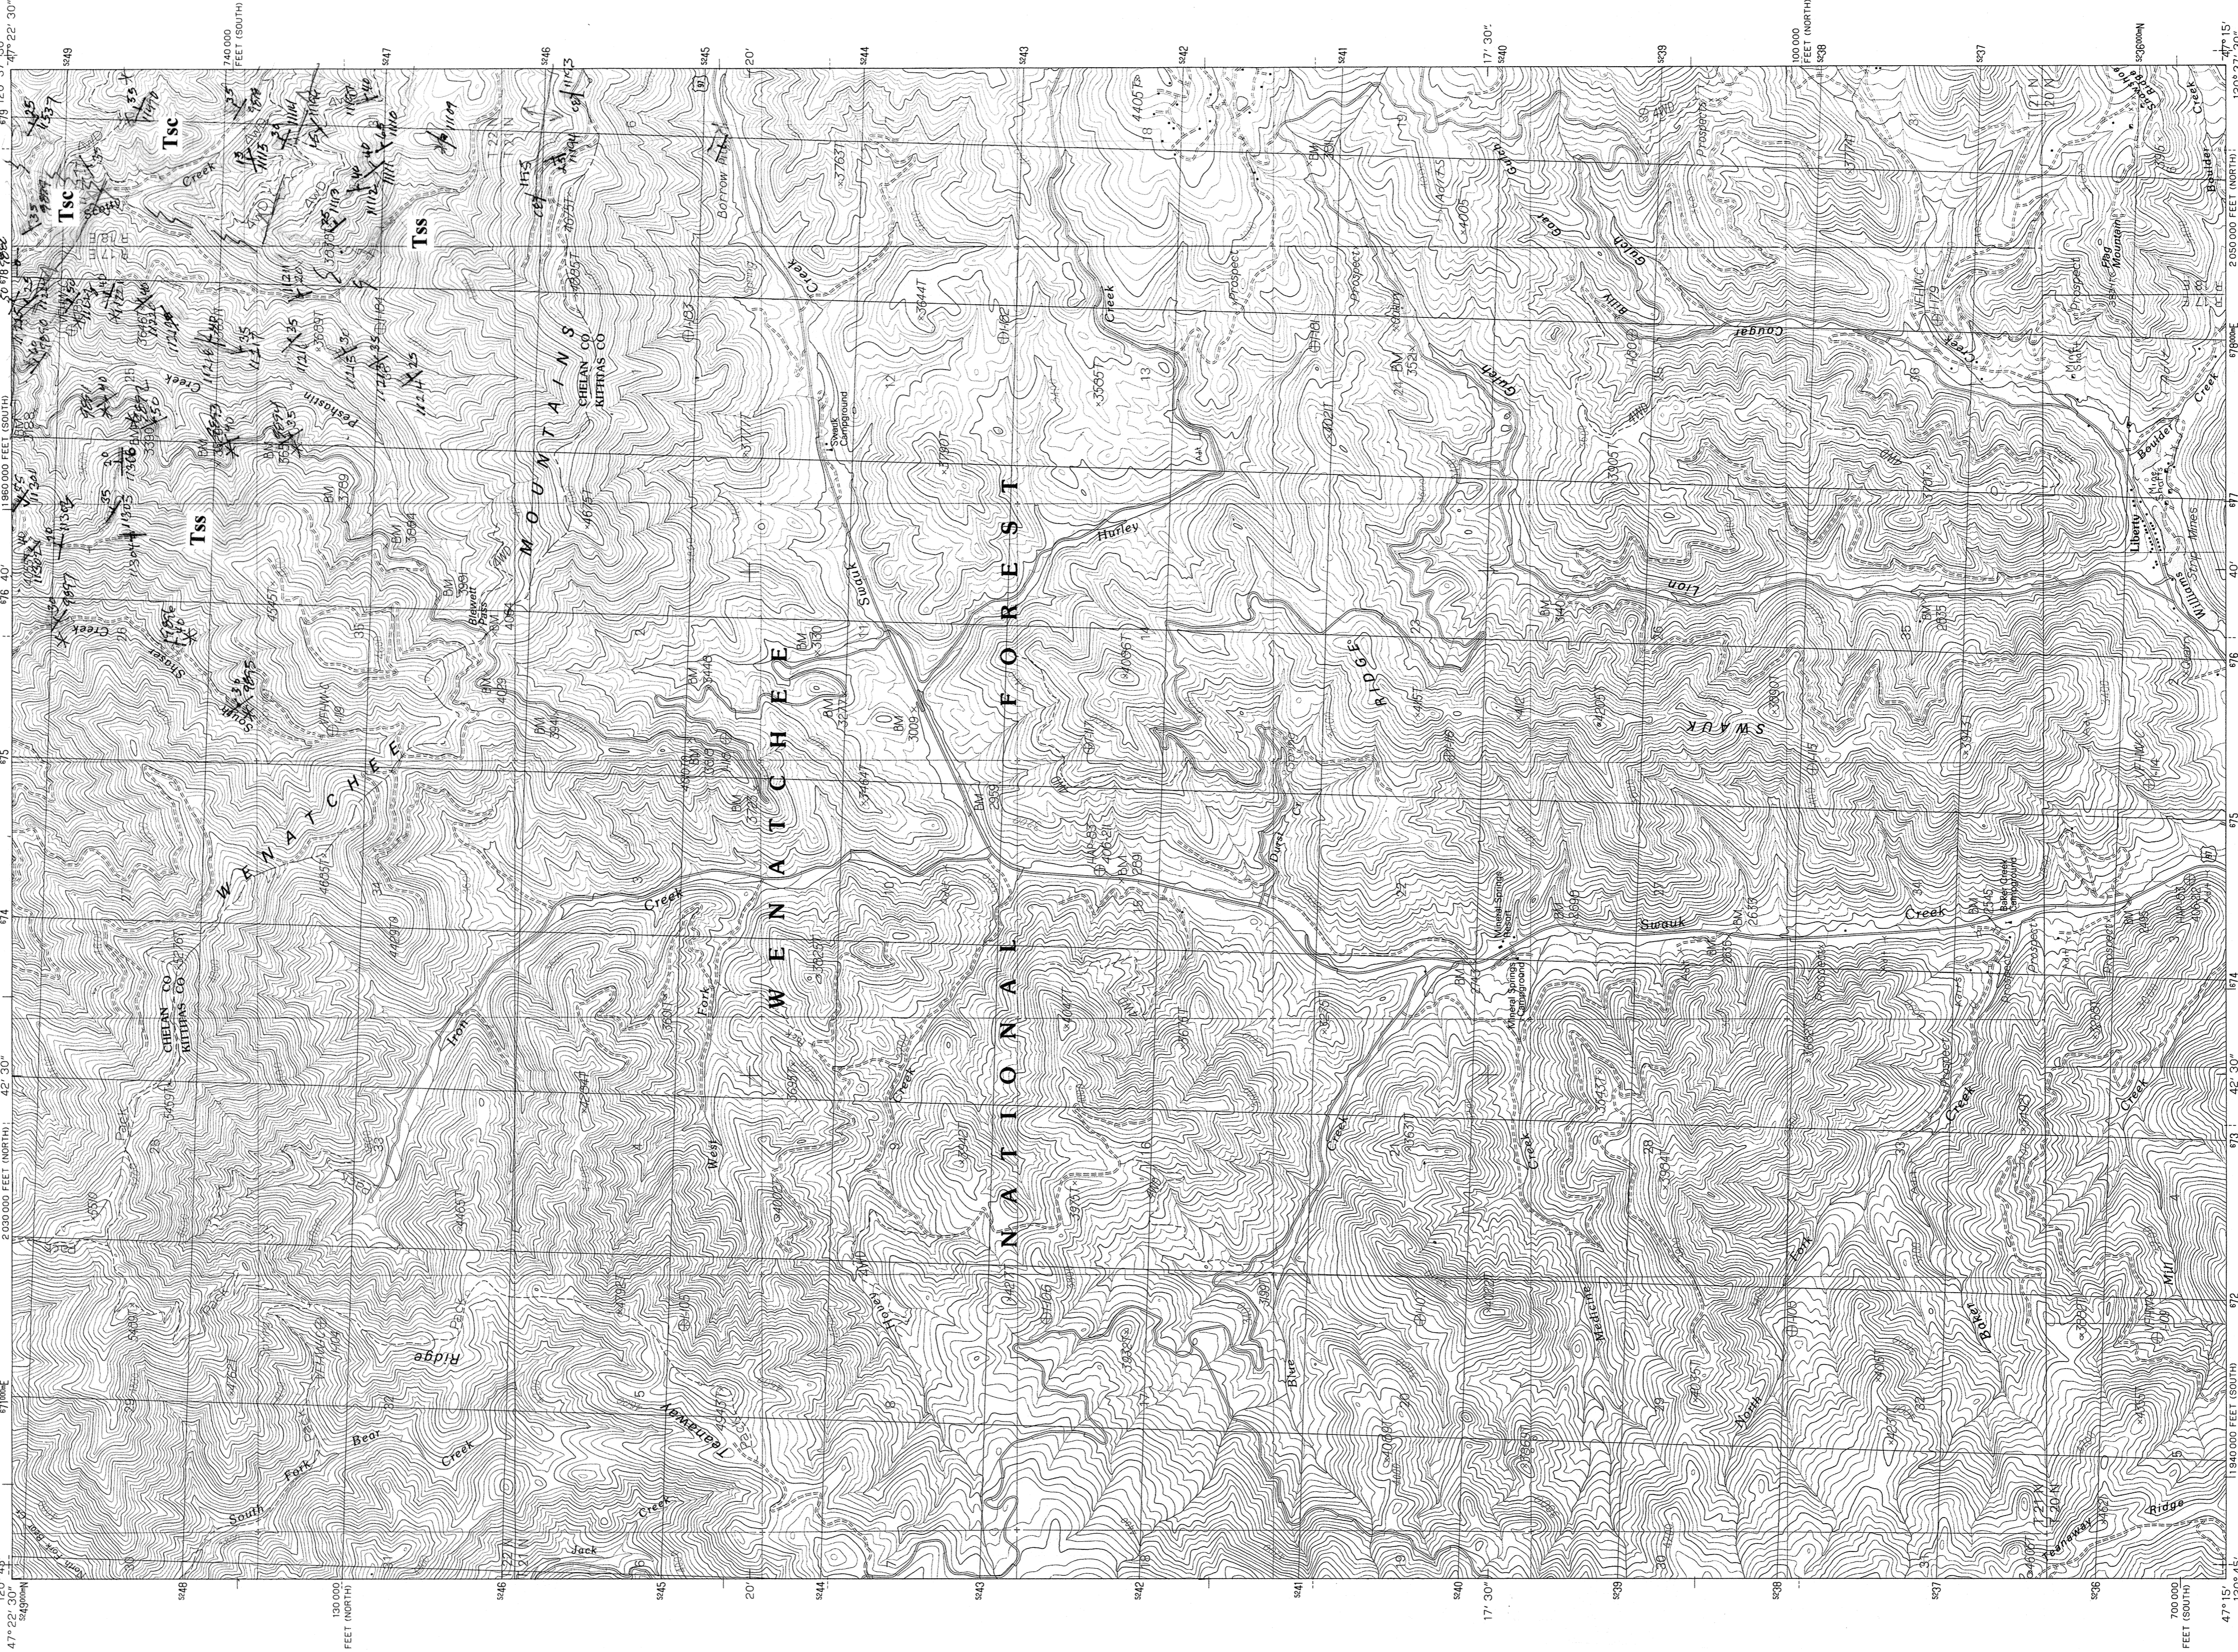

LIBERTY (map 2 of 9) of Geological Society of America Data Repository Item 2009211  
(Submitted November 2009) to accompany Cheney, E. S., and Hayman, N.W., 2009.  
Geological Society of America

PRODUCED BY THE UNITED STATES GEOLOGICAL SURVEY  
CONTROL BY AERIAL PHOTOGRAPHS TAKEN IN 1958, 1964, 1968, 1972, 1976, 1980, 1984, 1988, 1992, 1996, 2000, 2004, 2008, 2012, 2016, 2020, 2024, 2028, 2032, 2036, 2040, 2044, 2048, 2052, 2056, 2060, 2064, 2068, 2072, 2076, 2080, 2084, 2088, 2092, 2096, 2100, 2104, 2108, 2112, 2116, 2120, 2124, 2128, 2132, 2136, 2140, 2144, 2148, 2152, 2156, 2160, 2164, 2168, 2172, 2176, 2180, 2184, 2188, 2192, 2196, 2200, 2204, 2208, 2212, 2216, 2220, 2224, 2228, 2232, 2236, 2240, 2244, 2248, 2252, 2256, 2260, 2264, 2268, 2272, 2276, 2280, 2284, 2288, 2292, 2296, 2300, 2304, 2308, 2312, 2316, 2320, 2324, 2328, 2332, 2336, 2340, 2344, 2348, 2352, 2356, 2360, 2364, 2368, 2372, 2376, 2380, 2384, 2388, 2392, 2396, 2400, 2404, 2408, 2412, 2416, 2420, 2424, 2428, 2432, 2436, 2440, 2444, 2448, 2452, 2456, 2460, 2464, 2468, 2472, 2476, 2480, 2484, 2488, 2492, 2496, 2500, 2504, 2508, 2512, 2516, 2520, 2524, 2528, 2532, 2536, 2540, 2544, 2548, 2552, 2556, 2560, 2564, 2568, 2572, 2576, 2580, 2584, 2588, 2592, 2596, 2600, 2604, 2608, 2612, 2616, 2620, 2624, 2628, 2632, 2636, 2640, 2644, 2648, 2652, 2656, 2660, 2664, 2668, 2672, 2676, 2680, 2684, 2688, 2692, 2696, 2700, 2704, 2708, 2712, 2716, 2720, 2724, 2728, 2732, 2736, 2740, 2744, 2748, 2752, 2756, 2760, 2764, 2768, 2772, 2776, 2780, 2784, 2788, 2792, 2796, 2800, 2804, 2808, 2812, 2816, 2820, 2824, 2828, 2832, 2836, 2840, 2844, 2848, 2852, 2856, 2860, 2864, 2868, 2872, 2876, 2880, 2884, 2888, 2892, 2896, 2900, 2904, 2908, 2912, 2916, 2920, 2924, 2928, 2932, 2936, 2940, 2944, 2948, 2952, 2956, 2960, 2964, 2968, 2972, 2976, 2980, 2984, 2988, 2992, 2996, 3000, 3004, 3008, 3012, 3016, 3020, 3024, 3028, 3032, 3036, 3040, 3044, 3048, 3052, 3056, 3060, 3064, 3068, 3072, 3076, 3080, 3084, 3088, 3092, 3096, 3100, 3104, 3108, 3112, 3116, 3120, 3124, 3128, 3132, 3136, 3140, 3144, 3148, 3152, 3156, 3160, 3164, 3168, 3172, 3176, 3180, 3184, 3188, 3192, 3196, 3200, 3204, 3208, 3212, 3216, 3220, 3224, 3228, 3232, 3236, 3240, 3244, 3248, 3252, 3256, 3260, 3264, 3268, 3272, 3276, 3280, 3284, 3288, 3292, 3296, 3300, 3304, 3308, 3312, 3316, 3320, 3324, 3328, 3332, 3336, 3340, 3344, 3348, 3352, 3356, 3360, 3364, 3368, 3372, 3376, 3380, 3384, 3388, 3392, 3396, 3400, 3404, 3408, 3412, 3416, 3420, 3424, 3428, 3432, 3436, 3440, 3444, 3448, 3452, 3456, 3460, 3464, 3468, 3472, 3476, 3480, 3484, 3488, 3492, 3496, 3500, 3504, 3508, 3512, 3516, 3520, 3524, 3528, 3532, 3536, 3540, 3544, 3548, 3552, 3556, 3560, 3564, 3568, 3572, 3576, 3580, 3584, 3588, 3592, 3596, 3600, 3604, 3608, 3612, 3616, 3620, 3624, 3628, 3632, 3636, 3640, 3644, 3648, 3652, 3656, 3660, 3664, 3668, 3672, 3676, 3680, 3684, 3688, 3692, 3696, 3700, 3704, 3708, 3712, 3716, 3720, 3724, 3728, 3732, 3736, 3740, 3744, 3748, 3752, 3756, 3760, 3764, 3768, 3772, 3776, 3780, 3784, 3788, 3792, 3796, 3800, 3804, 3808, 3812, 3816, 3820, 3824, 3828, 3832, 3836, 3840, 3844, 3848, 3852, 3856, 3860, 3864, 3868, 3872, 3876, 3880, 3884, 3888, 3892, 3896, 3900, 3904, 3908, 3912, 3916, 3920, 3924, 3928, 3932, 3936, 3940, 3944, 3948, 3952, 3956, 3960, 3964, 3968, 3972, 3976, 3980, 3984, 3988, 3992, 3996, 4000, 4004, 4008, 4012, 4016, 4020, 4024, 4028, 4032, 4036, 4040, 4044, 4048, 4052, 4056, 4060, 4064, 4068, 4072, 4076, 4080, 4084, 4088, 4092, 4096, 4100, 4104, 4108, 4112, 4116, 4120, 4124, 4128, 4132, 4136, 4140, 4144, 4148, 4152, 4156, 4160, 4164, 4168, 4172, 4176, 4180, 4184, 4188, 4192, 4196, 4200, 4204, 4208, 4212, 4216, 4220, 4224, 4228, 4232, 4236, 4240, 4244, 4248, 4252, 4256, 4260, 4264, 4268, 4272, 4276, 4280, 4284, 4288, 4292, 4296, 4300, 4304, 4308, 4312, 4316, 4320, 4324, 4328, 4332, 4336, 4340, 4344, 4348, 4352, 4356, 4360, 4364, 4368, 4372, 4376, 4380, 4384, 4388, 4392, 4396, 4400, 4404, 4408, 4412, 4416, 4420, 4424, 4428, 4432, 4436, 4440, 4444, 4448, 4452, 4456, 4460, 4464, 4468, 4472, 4476, 4480, 4484, 4488, 4492, 4496, 4500, 4504, 4508, 4512, 4516, 4520, 4524, 4528, 4532, 4536, 4540, 4544, 4548, 4552, 4556, 4560, 4564, 4568, 4572, 4576, 4580, 4584, 4588, 4592, 4596, 4600, 4604, 4608, 4612, 4616, 4620, 4624, 4628, 4632, 4636, 4640, 4644, 4648, 4652, 4656, 4660, 4664, 4668, 4672, 4676, 4680, 4684, 4688, 4692, 4696, 4700, 4704, 4708, 4712, 4716, 4720, 4724, 4728, 4732, 4736, 4740, 4744, 4748, 4752, 4756, 4760, 4764, 4768, 4772, 4776, 4780, 4784, 4788, 4792, 4796, 4800, 4804, 4808, 4812, 4816, 4820, 4824, 4828, 4832, 4836, 4840, 4844, 4848, 4852, 4856, 4860, 4864, 4868, 4872, 4876, 4880, 4884, 4888, 4892, 4896, 4900, 4904, 4908, 4912, 4916, 4920, 4924, 4928, 4932, 4936, 4940, 4944, 4948, 4952, 4956, 4960, 4964, 4968, 4972, 4976, 4980, 4984, 4988, 4992, 4996, 5000, 5004, 5008, 5012, 5016, 5020, 5024, 5028, 5032, 5036, 5040, 5044, 5048, 5052, 5056, 5060, 5064, 5068, 5072, 5076, 5080, 5084, 5088, 5092, 5096, 5100, 5104, 5108, 5112, 5116, 5120, 5124, 5128, 5132, 5136, 5140, 5144, 5148, 5152, 5156, 5160, 5164, 5168, 5172, 5176, 5180, 5184, 5188, 5192, 5196, 5200, 5204, 5208, 5212, 5216, 5220, 5224, 5228, 5232, 5236, 5240, 5244, 5248, 5252, 5256, 5260, 5264, 5268, 5272, 5276, 5280, 5284, 5288, 5292, 5296, 5300, 5304, 5308, 5312, 5316, 5320, 5324, 5328, 5332, 5336, 5340, 5344, 5348, 5352, 5356, 5360, 5364, 5368, 5372, 5376, 5380, 5384, 5388, 5392, 5396, 5400, 5404, 5408, 5412, 5416, 5420, 5424, 5428, 5432, 5436, 5440, 5444, 5448, 5452, 5456, 5460, 5464, 5468, 5472, 5476, 5480, 5484, 5488, 5492, 5496, 5500, 5504, 5508, 5512, 5516, 5520, 5524, 5528, 5532, 5536, 5540, 5544, 5548, 5552, 5556, 5560, 5564, 5568, 5572, 5576, 5580, 5584, 5588, 5592, 5596, 5600, 5604, 5608, 5612, 5616, 5620, 5624, 5628, 5632, 5636, 5640, 5644, 5648, 5652, 5656, 5660, 5664, 5668, 5672, 5676, 5680, 5684, 5688, 5692, 5696, 5700, 5704, 5708, 5712, 5716, 5720, 5724, 5728, 5732, 5736, 5740, 5744, 5748, 5752, 5756, 5760, 5764, 5768, 5772, 5776, 5780, 5784, 5788, 5792, 5796, 5800, 5804, 5808, 5812, 5816, 5820, 5824, 5828, 5832, 5836, 5840, 5844, 5848, 5852, 5856, 5860, 5864, 5868, 5872, 5876, 5880, 5884, 5888, 5892, 5896, 5900, 5904, 5908, 5912, 5916, 5920, 5924, 5928, 5932, 5936, 5940, 5944, 5948, 5952, 5956, 5960, 5964, 5968, 5972, 5976, 5980, 5984, 5988, 5992, 5996, 6000, 6004, 6008, 6012, 6016, 6020, 6024, 6028, 6032, 6036, 6040, 6044, 6048, 6052, 6056, 6060, 6064, 6068, 6072, 6076, 6080, 6084, 6088, 6092, 6096, 6100, 6104, 6108, 6112, 6116, 6120, 6124, 6128, 6132, 6136, 6140, 6144, 6148, 6152, 6156, 6160, 6164, 6168, 6172, 6176, 6180, 6184, 6188, 6192, 6196, 6200, 6204, 6208, 6212, 6216, 6220, 6224, 6228, 6232, 6236, 6240, 6244, 6248, 6252, 6256, 6260, 6264, 6268, 6272, 6276, 6280, 6284, 6288, 6292, 6296, 6300, 6304, 6308, 6312, 6316, 6320, 6324, 6328, 6332, 6336, 6340, 6344, 6348, 6352, 6356, 6360, 6364, 6368, 6372, 6376, 6380, 6384, 6388, 6392, 6396, 6400, 6404, 6408, 6412, 6416, 6420, 6424, 6428, 6432, 6436, 6440, 6444, 6448, 6452, 6456, 6460, 6464, 6468, 6472, 6476, 6480, 6484, 6488, 6492, 6496, 6500, 6504, 6508, 6512, 6516, 6520, 6524, 6528, 6532, 6536, 6540, 6544, 6548, 6552, 6556, 6560, 6564, 6568, 6572, 6576, 6580, 6584, 6588, 6592, 6596, 6600, 6604, 6608, 6612, 6616, 6620, 6624, 6628, 6632, 6636, 6640, 6644, 6648, 6652, 6656, 6660, 6664, 6668, 6672, 6676, 6680, 6684, 6688, 6692, 6696, 6700, 6704, 6708, 6712, 6716, 6720, 6724, 6728, 6732, 6736, 6740, 6744, 6748, 6752, 6756, 6760, 6764, 6768, 6772, 6776, 6780, 6784, 6788, 6792, 6796, 6800, 6804, 6808, 6812, 6816, 6820, 6824, 6828, 6832, 6836, 6840, 6844, 6848, 6852, 6856, 6860, 6864, 6868, 6872, 6876, 6880, 6884, 6888, 6892, 6896, 6900, 6904, 6908, 6912, 6916, 6920, 6924, 6928, 6932, 6936, 6940, 6944, 6948, 6952, 6956, 6960, 6964, 6968, 6972, 6976, 6980, 6984, 6988, 6992, 6996, 7000, 7004, 7008, 7012, 7016, 7020, 7024, 7028, 7032, 7036, 7040, 7044, 7048, 7052, 7056, 7060, 7064, 7068, 7072, 7076, 7080, 7084, 7088, 7092, 7096, 7100, 7104, 7108, 7112, 7116, 7120, 7124, 7128, 7132, 7136, 7140, 7144, 7148, 7152, 7156, 7160, 7164, 7168, 7172, 7176, 7180, 7184, 7188, 7192, 7196, 7200, 7204, 7208, 7212, 7216, 7220, 7224, 7228, 7232, 7236, 7240, 7244, 7248, 7252, 7256, 7260, 7264, 7268, 7272, 7276, 7280, 7284, 7288, 7292, 7296, 7300, 7304, 7308, 7312, 7316, 7320, 7324, 7328, 7332, 7336, 7340, 7344, 7348, 7352, 7356, 7360, 7364, 7368, 7372, 7376, 7380, 7384, 7388, 7392, 7396, 7400, 7404, 7408, 7412, 7416, 7420, 7424, 7428, 7432, 7436, 7440, 7444, 7448, 7452, 7456, 7460, 7464, 7468, 7472, 7476, 7480, 7484, 7488, 7492, 7496, 7500, 7504, 7508, 7512, 7516, 7520, 7524, 7528, 7532, 7536, 7540, 7544, 7548, 7552, 7556, 7560, 7564, 7568, 7572, 7576, 7580, 7584, 7588, 7592, 7596, 7600, 7604, 7608, 7612, 7616, 7620, 7624, 7628, 7632, 7636, 7640, 7644, 7648, 7652, 7656, 7660, 7664, 7668, 7672, 7676, 7680, 7684, 7688, 7692, 7696, 7700, 7704, 7708, 7712, 7716, 7720, 7724, 7728, 7732, 7736, 7740, 7744, 7748, 7752, 7756, 7760, 7764, 7768, 7772, 7776, 7780, 7784, 7788, 7792, 7796, 7800, 7804, 7808, 7812, 7816, 7820, 7824, 7828, 7832, 7836, 7840, 7844, 7848, 7852, 7856, 7860, 7864, 7868, 7872, 7876, 7880, 7884, 7888, 7892, 7896, 7900, 7904, 7908, 7912, 7916, 7920, 7924, 7928, 7932, 7936, 7940, 7944, 7948, 7952, 7956, 7960, 7964, 7968, 7972, 7976, 7980, 7984, 7988, 7992, 7996, 8000, 8004, 8008, 8012, 8016, 8020, 8024, 8028, 8032, 8036, 8040, 8044, 8048, 8052, 8056, 8060, 8064, 8068, 8072, 8076, 8080, 8084, 8088, 8092, 8096, 8100, 8104, 8108, 8112, 8116, 8120, 8124, 8128, 8132, 8136, 8140, 8144, 8148, 8152, 8156, 8160, 8164, 8168, 8172, 8176, 8180, 8184, 8188, 8192, 8196, 8200, 8204, 8208, 8212, 8216, 8220, 8224, 8228, 8232, 8236, 8240, 8244, 8248, 8252, 8256, 8260, 8264, 8268, 8272, 8276, 8280, 8284, 8288, 8292, 8296, 8300, 8304, 8308, 8312, 8316, 8320, 8324, 8328, 8332, 8336, 8340, 8344, 8348, 8352, 8356, 8360, 8364, 8368, 8372, 8376, 8380, 8384, 8388, 8392, 8396, 8400, 8404, 8408, 8412, 8416, 8420, 8424, 8428, 8432, 8436, 8440, 8444, 8448, 8452, 8456, 8460, 8464, 8468, 8472, 8476, 8480, 8484, 8488, 8492, 8496, 8500, 8504, 8508, 8512, 8516, 8520, 8524, 8528, 8532, 8536, 8540, 8544, 8548, 8552, 8556, 8560, 8564, 8568, 8572, 8576, 8580, 8584, 8588, 8592, 8596, 8600, 8604, 8608, 8612, 8616, 8620, 8624, 8628, 8632, 8636, 8640, 8644, 8648, 8652, 8656, 8660, 8664, 8668, 8672, 8676, 8680, 8684, 8688, 8692, 8696, 8700, 8704, 8708, 8712, 8716, 8720, 8724, 8728, 8732, 8736, 8740, 8744, 8748, 8752, 8756, 8760, 8764, 8768, 8772, 8776, 8780, 8784, 8788, 8792, 8796, 8800, 8804, 8808, 8812, 8816, 8820, 8824, 8828, 8832, 8836, 8840, 8844, 8848, 8852, 8856, 8860, 8864, 8868, 8872, 8876, 8880, 8884, 8888, 8892, 8896, 8900, 8904, 8908, 8912, 8916, 8920, 8924, 8928, 8932, 8936, 8940, 8944, 8948, 8952, 8956, 8960, 8964, 8968, 8972, 8976, 8980, 8984, 8988, 8992, 8996, 9000, 9004, 9008, 9012, 9016, 9020, 9024, 9028, 9032, 9036, 9040, 9044, 9048, 9052, 9056, 9060, 9064, 9068, 9072, 9076, 9080, 9084, 9088, 9092, 9096, 9100, 9104, 9108, 9112, 9116, 9120, 9124, 9128, 9132, 9136, 9140, 9144, 9148, 9152, 9156, 9160, 9164, 9168, 9172, 9176, 9180, 9184, 9188, 9192, 9196, 9200, 9204, 9208, 9212, 9216, 9220, 9224, 9228, 9232, 9236, 9240, 9244, 9248, 9252, 9256, 9260, 9264, 9268, 9272, 9276, 9280, 9284, 9288, 9292, 9296, 9300, 9304, 9308, 9312, 9316, 9320, 9324, 9328, 9332, 9336, 9340, 9344, 9348, 9352, 9356, 9360, 9364, 9368, 9372, 9376, 9380, 9384, 9388, 9392, 9396, 9400, 9404, 9408, 9412, 9416, 9420, 9424, 9428, 9432, 9436, 9440, 9444, 9448, 9452, 9456, 9460, 9464, 9468, 9472, 9476, 9480, 9484, 9488, 9492, 9496, 9500, 9504, 9508, 9512, 9516, 9520, 9524, 9528, 9532, 9536, 9540, 9544, 9548, 9552, 9556, 9560, 9564, 9568, 9572, 9576, 9580, 9584, 9588, 9592, 9596, 9600, 9604, 9608, 9612, 9616, 9620, 9624, 9628, 9632, 9636, 9640, 9644, 9648, 9652, 9656, 9660, 9664, 9668, 9672, 9676, 9680, 9684, 9688, 9692, 9696, 9700, 9704, 9708, 9712, 9716, 9720, 9724, 9728, 9732, 9736, 9740, 9744, 9748, 9752, 9756, 9760, 9764, 9768, 9772, 9776, 9780, 9784, 9788, 9792, 9796, 9800, 9804, 9808, 9812, 9816, 9820, 9824, 9828, 9832, 9836, 9840, 9844, 9848, 9852, 9856, 9860, 9

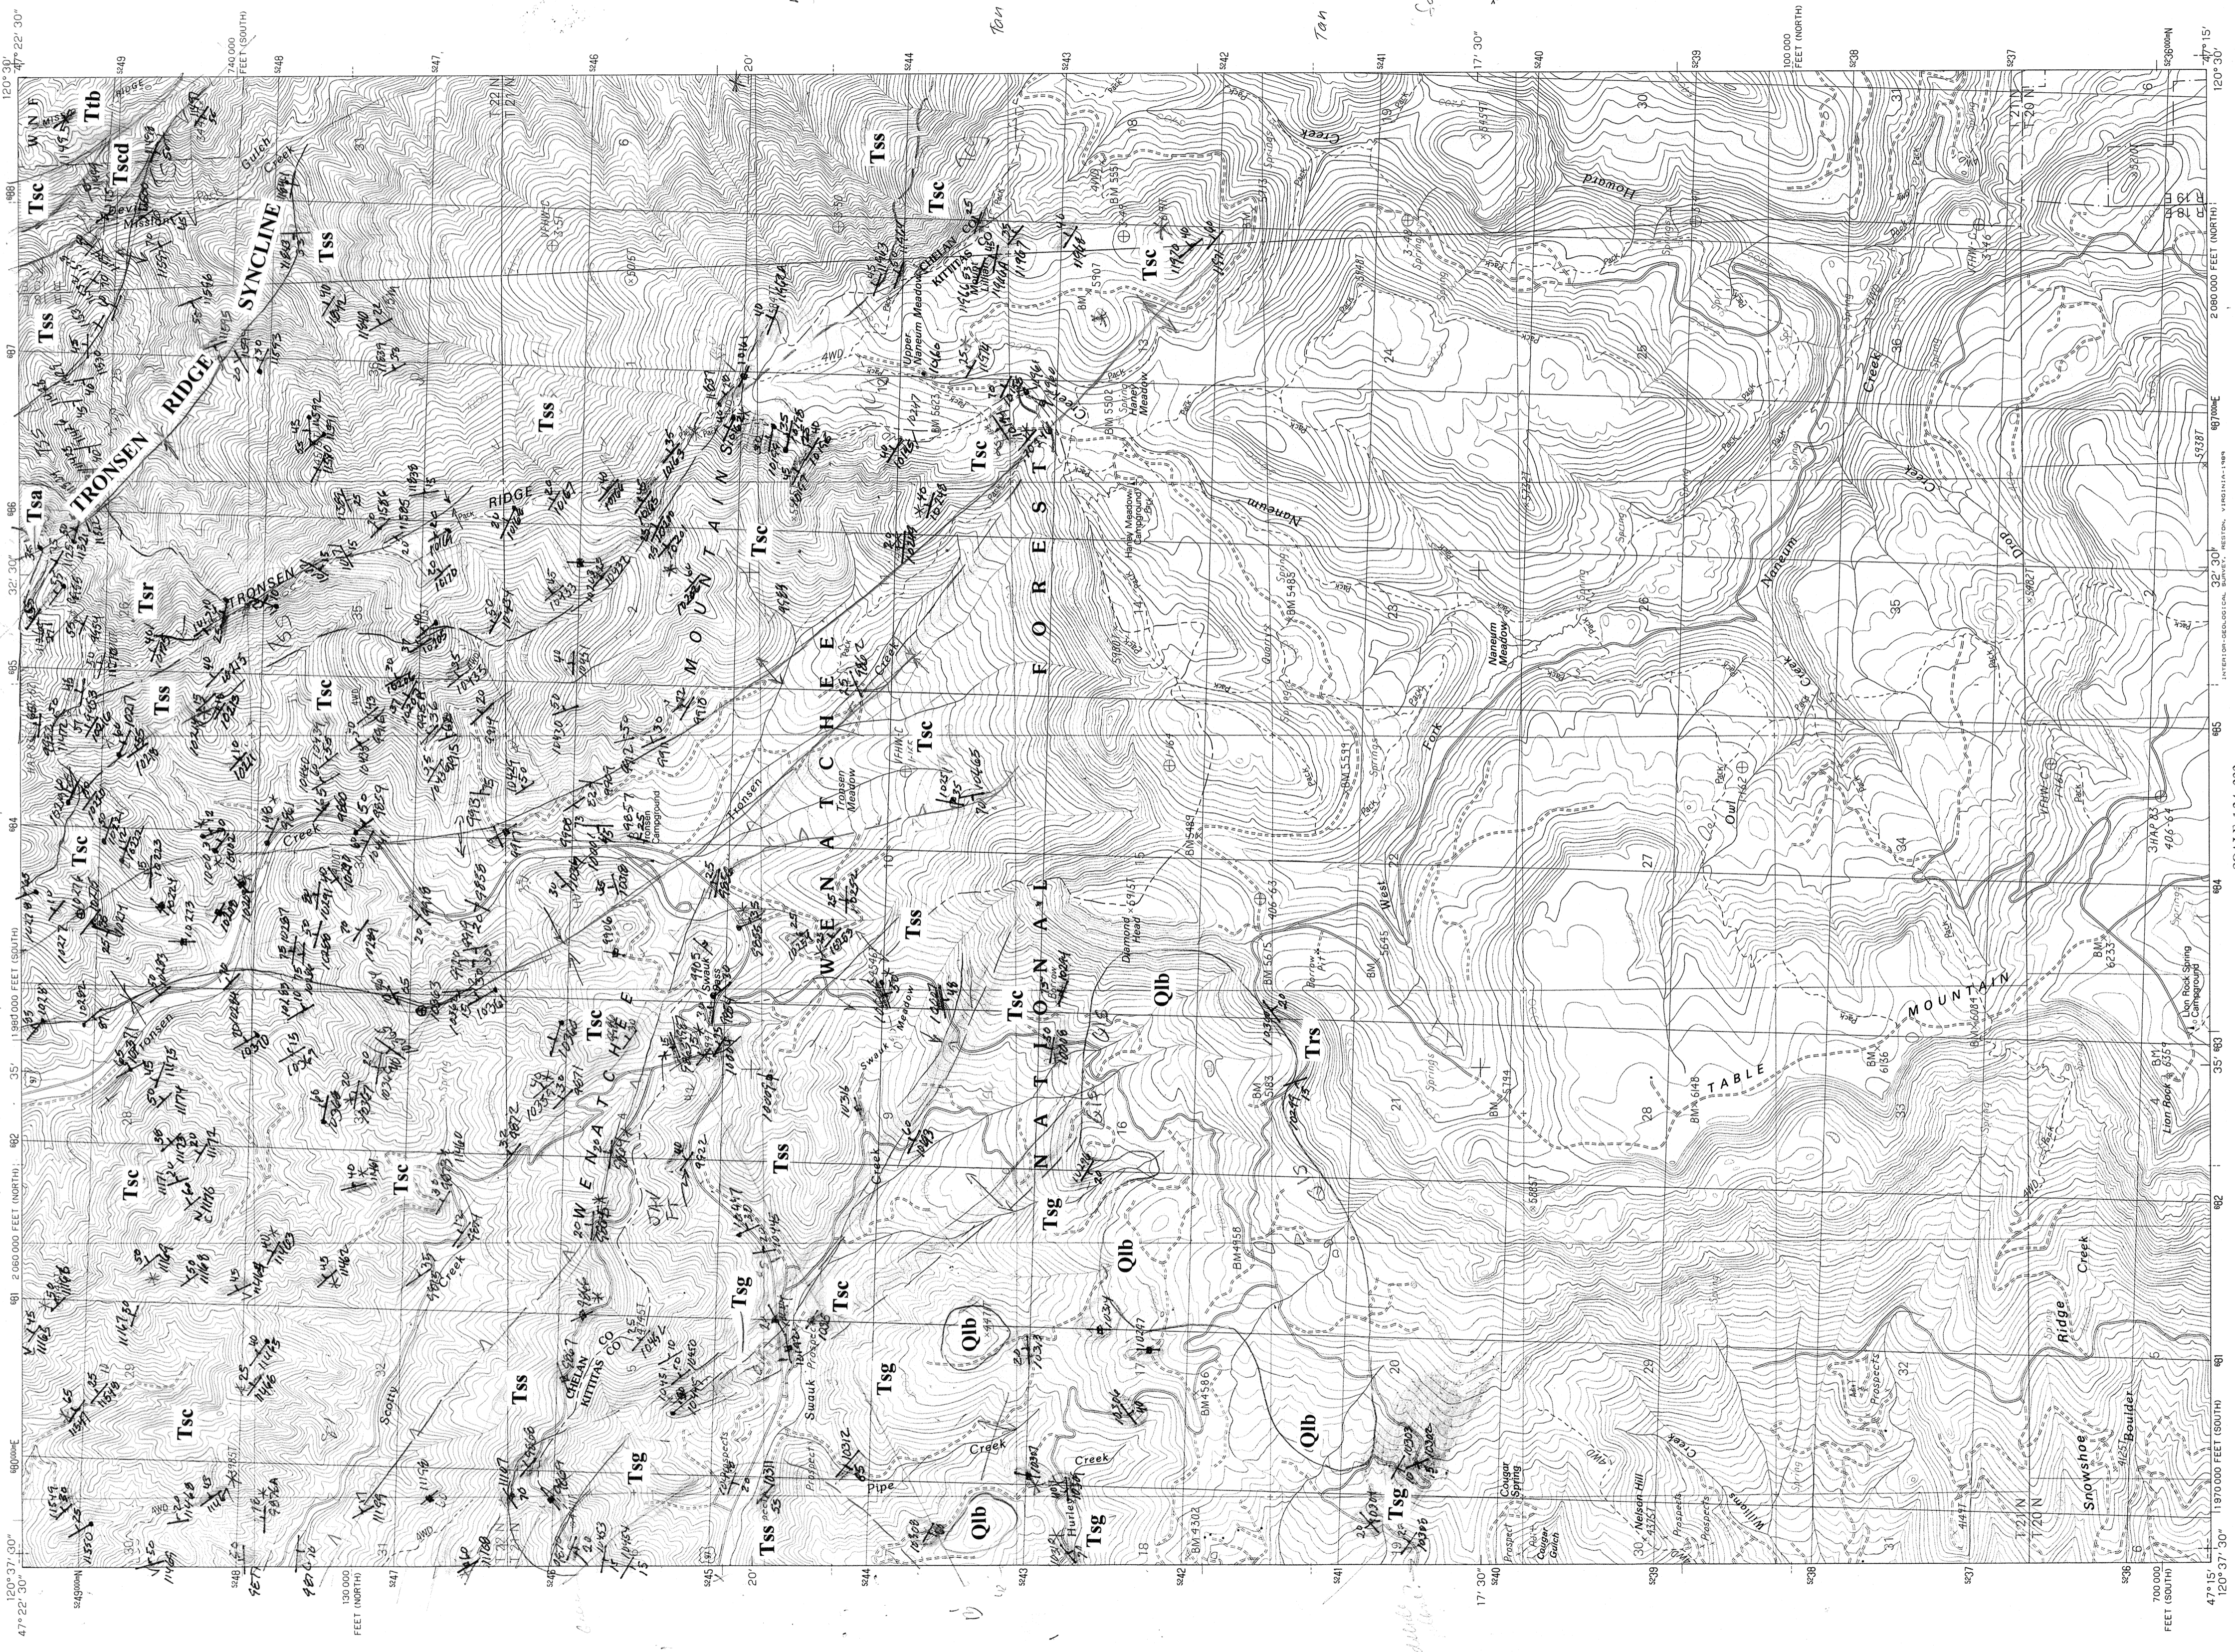

PRODUCED BY THE UNITED STATES GEOLOGICAL SURVEY  
CONTROL BY . . . . . USGS NOS/NOAA  
FIELD FROM AERIAL PHOTOGRAPHS TAKEN . . . . . 1967  
LIMITED REVISION FROM AERIAL PHOTOGRAPHS TAKEN . . . . . 1985  
FIELD CHECKED . . . . . 1987 MAP EDITED . . . . . CANADIAN 1989  
GRID . . . . . UTM UNIVERSAL TRANSVERSE MERCATOR . . . . . ZONE 10  
GRID . . . . . 1000-METER STATE GRID TICS . . . . . WASHINGTON SOUTH ZONE  
UTM GRID DECLINATION . . . . . WASHINGTON NORTH ZONE  
1983 MAGNETIC NORTH DECLINATION . . . . . 1973° EAST  
VERTICAL DATUM . . . . . NATIONAL GEODETIC VERTICAL DATUM OF 1959  
To place on the predicted North American Datum of 1983,  
move the projection lines as shown by dashed corner ticks  
(20 meters north and 89 meters east)

PROVISIONAL MAP  
Produced from original  
manuscript drawings. Infor-  
mation shown as of date of

SCALE 1:24 000

CONTOUR INTERVAL 40 FEET  
To convert feet to meters multiply by .3048  
To convert meters to feet multiply by 3.2808

ROAD LEGEND

- Improved Road
- Unimproved Road
- Trail
- Interstate Route
- U.S. Route
- State Route

QUADRANGLE LOCATION

WASHINGTON

1 2 3 4 5 6 7 8

1 Blount  
2 Tip-top  
3 Monitor  
4 Mission Peak  
5 House Carro  
6 Nason Canyon

2009, Geological Society of America Guidebook 15, p. 19-52.  
2009211 (submitted November 2009) to accompany Cheney, E. S., and Hayman, N. W.,  
BLEWETT PASS (map 1 of 9) of Geological Society of America Data Repository Item

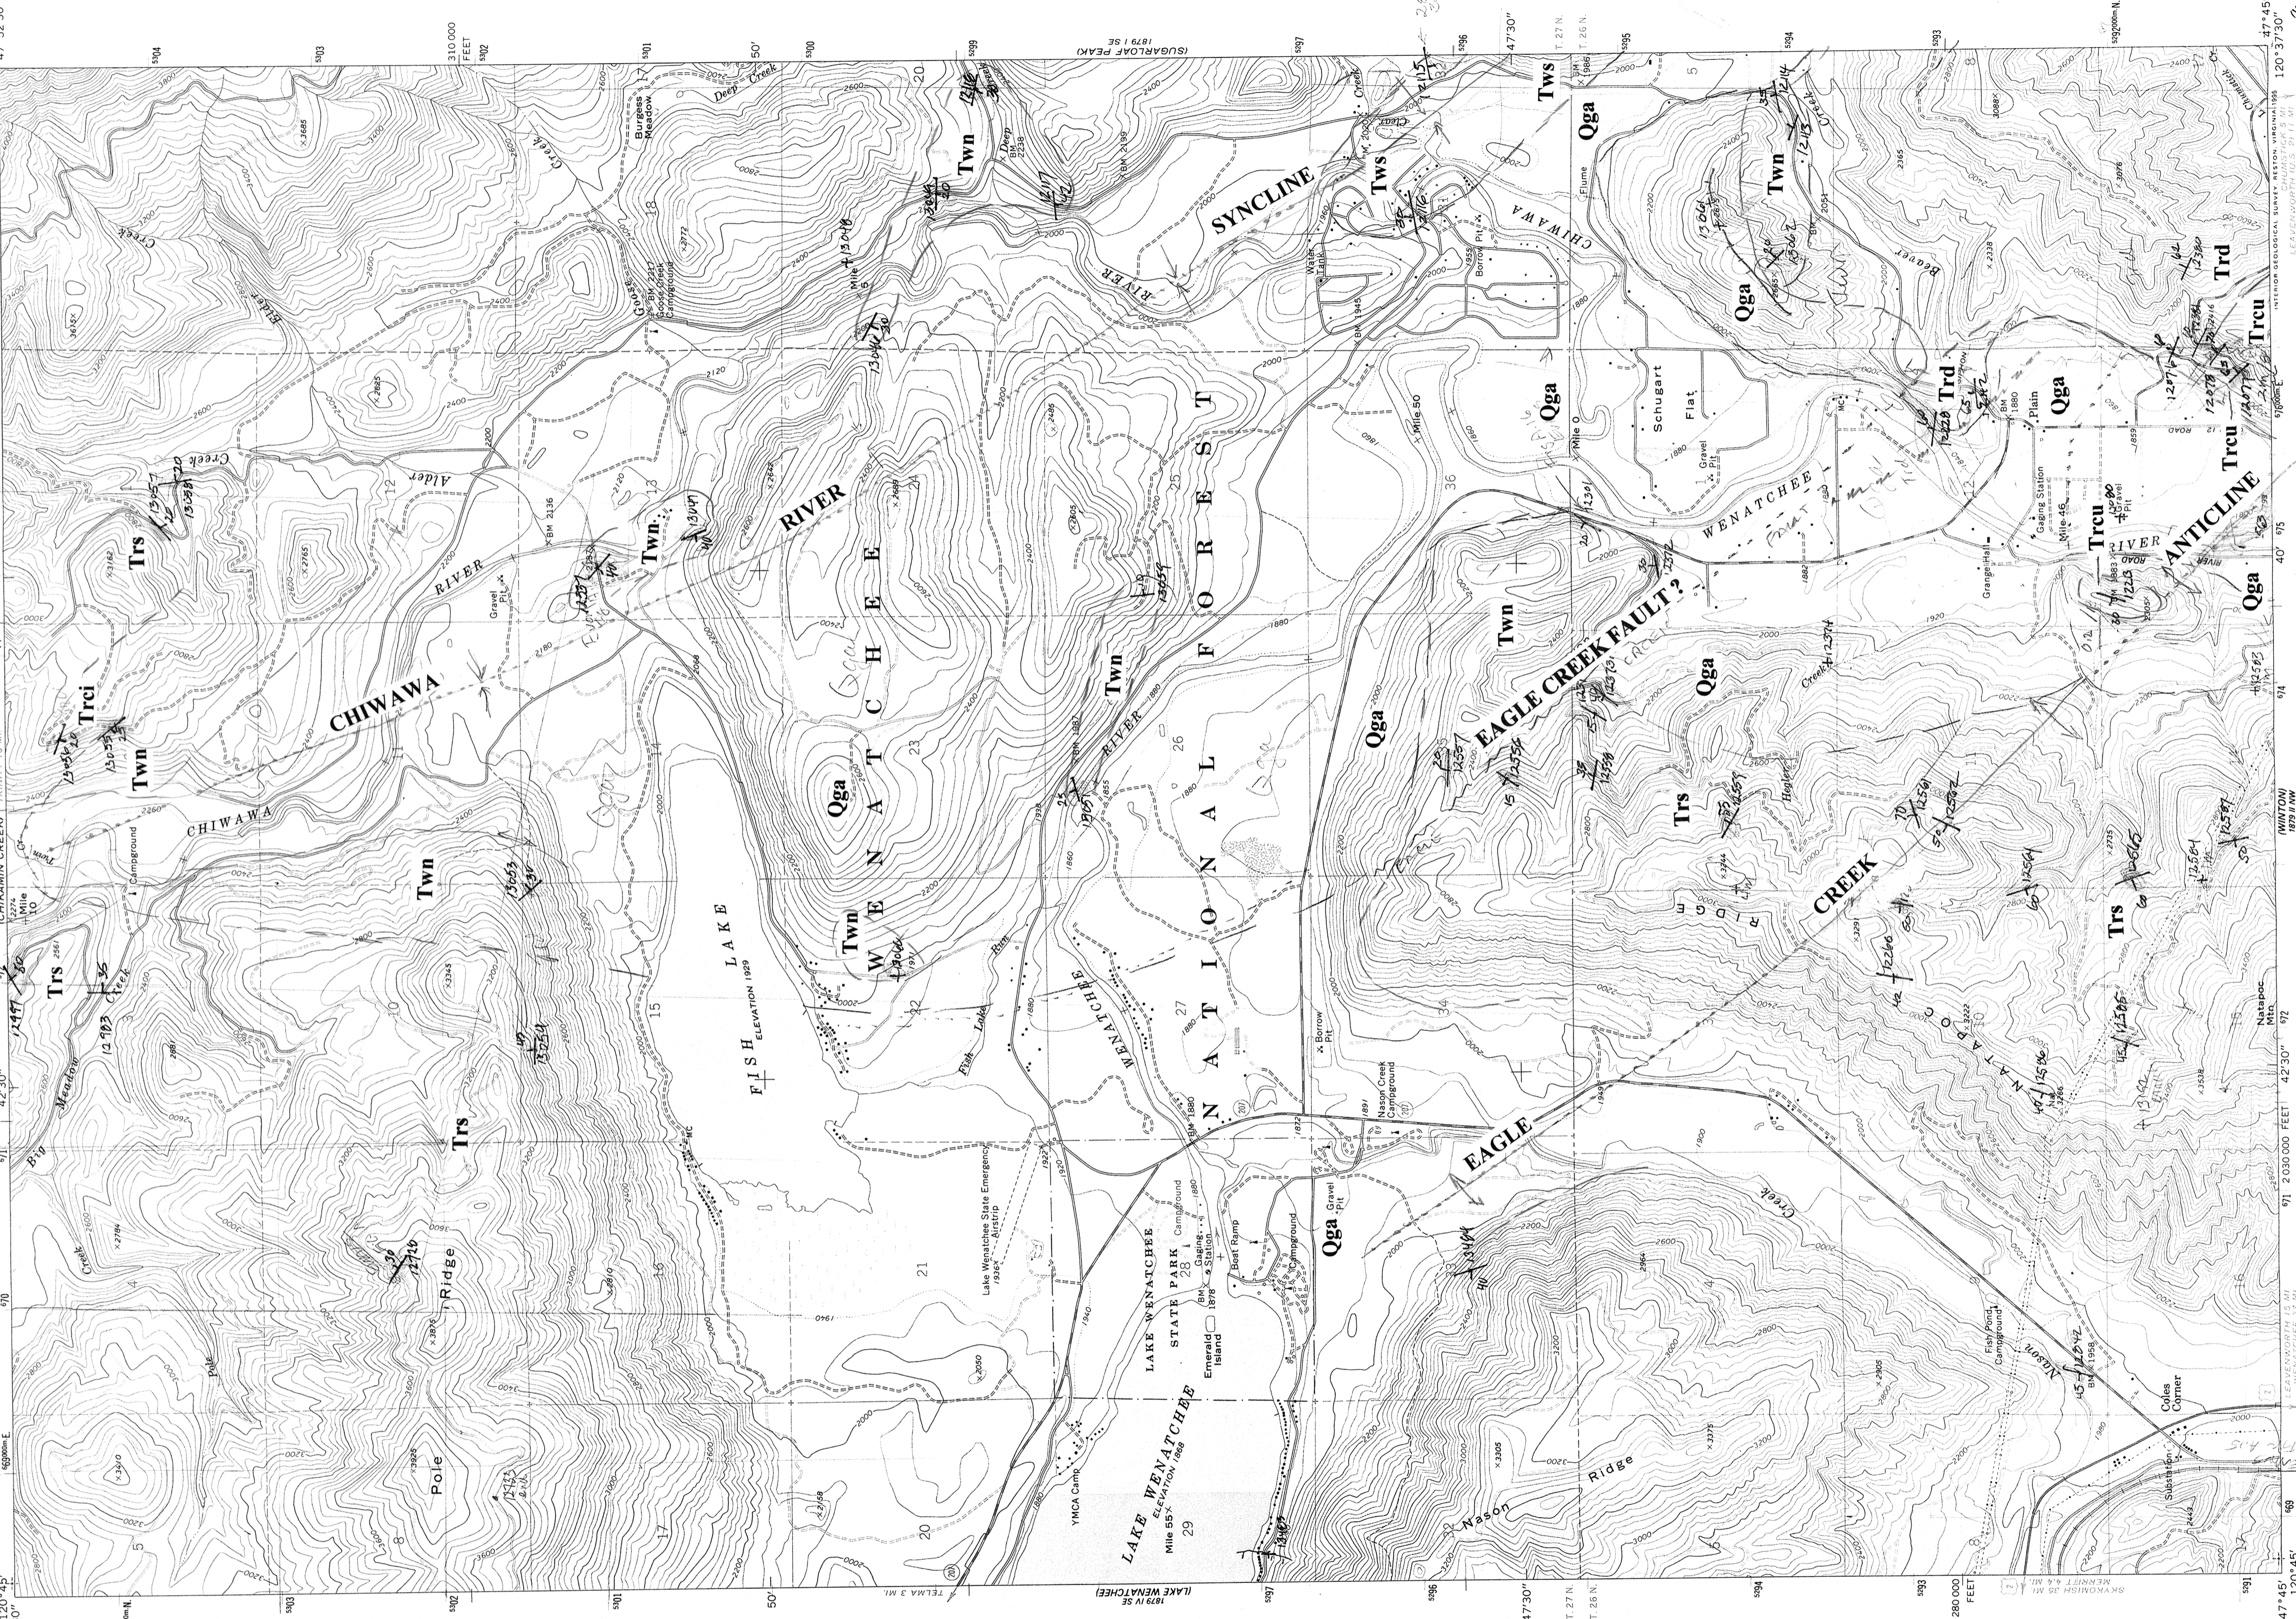

Produced by the United States Geological Survey  
Control by USGS and NOSNOAA  
Compiled from aerial photographs taken 1967. Field checked 1968  
North American Datum of 1927 (NAD 27). Projection and  
1000-foot ticks: Washington Coordinate System, north zone  
(Blue 1000-meter Universal Transverse Mercator ticks, zone 10  
North American Datum of 1983 (NAD 83) is shown by dashed  
corner ticks. The values of the shift between NAD 27 and NAD 83  
for 7.5-minute intersections are obtainable from National Geodetic  
Survey NADCON software  
There may be private inholdings within the boundaries of the  
National or State reservations shown on this map  
Certain land lines are omitted because of insufficient data

SCALE 1:24,000  
0 1000 2000 3000 4000 5000 6000 7000 FEET  
0 1 2 3 4 5 6 KILOMETER  
CONTOUR INTERVAL 40 FEET  
SUPPLEMENTARY CONTOUR INTERVAL 20 FEET  
NATIONAL GEODETIC VERTICAL DATUM OF 1929

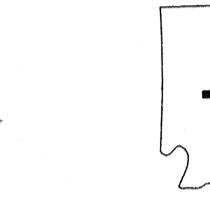

ROAD CLASSIFICATION  
Primary highway,  
hard surface  
Secondary highway,  
hard surface  
Light-duty road, hard or  
improved surface  
Unimproved road  
Interstate Route U. S. Route State Route

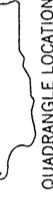

PLAIN, WA  
47120-56-TF-024  
1968

PHOTOREVISED 1987  
DMA 1879 1 SW-SERIES 1981
